# Supplementary material for: Chemistry and folding of photomodulable peptides – stilbene and thioaurone-type candidates for conformational switches
Source: Royal Society of Chemistry journal article supplement (doi:10.1039/b812001c), 2008-01-01
Supplement: b812001c.pdf [file b812001c.pdf]

## **Chemistry and Folding of Photomodulable Peptides - Stilbene and Thioaurone-type Candidates for Conformational Switches**

**Máté Erdélyi,<sup>ab</sup> Miranda Varedian,<sup>b</sup> Christian Sköld,<sup>a</sup> Ida B. Niklasson,<sup>a</sup> Johanna Nurbo,<sup>a</sup> Åsa Persson,<sup>a</sup> Jonas Bergquist<sup>c</sup> and Adolf Gogoll<sup>\*b</sup>**

<sup>a</sup>Dept. of Medicinal Chemistry, Uppsala University, Box 574, 751 23 Uppsala, Sweden. <sup>b</sup>Dept. of Biochemistry and Organic Chemistry, Uppsala University, Box 576, 751 23 Uppsala, Sweden. <sup>c</sup>Dept. of Physical and Analytical Chemistry, Uppsala University, Box 599, 751 24 Uppsala, Sweden. Fax: 46 18 4713818; Tel: 46 18 4713822; E-mail: [adolfgogoll@biorg.uu.se](mailto:adolfgogoll@biorg.uu.se)

|                                                                                                                                                                                |    |
|--------------------------------------------------------------------------------------------------------------------------------------------------------------------------------|----|
| Table S1 Amide proton temperature coefficients .....                                                                                                                           | 4  |
| Scheme S1: Hydrogen bonds in selected low energy conformers .....                                                                                                              | 5  |
| Figure S 1: $^1\text{H}$ NMR spectrum of compound <b>E-1</b> (300.0 MHz, $\text{CD}_3\text{OD}/\text{CH}_3\text{OH}$ (1:1) solution, 25°C).<br>.....                           | 6  |
| Figure S 2: $^1\text{H}$ NMR spectrum of compound <b>E-2</b> (499.9 MHz, $\text{CD}_3\text{OD}/\text{CH}_3\text{OH}$ (1:1) solution, solvent<br>suppression used, 25°C). ..... | 7  |
| Figure S 3: $^{13}\text{C}$ NMR spectrum of compound <b>E-2</b> (75 MHz, $\text{CD}_3\text{OD}/\text{CH}_3\text{OH}$ (1:1) solution, 25°C)...                                  | 8  |
| Figure S 4: $^1\text{H}$ NMR spectrum of compound <b>E-3</b> (499.9 MHz, $\text{CD}_3\text{OD}/\text{CH}_3\text{OH}$ (1:1) solution, solvent<br>suppression used, 25°C). ..... | 9  |
| Figure S 5: $^{13}\text{C}$ NMR spectrum of compound <b>E-3</b> (75 MHz, $\text{CD}_3\text{OD}/\text{CH}_3\text{OH}$ (1:1) solution, 25°C). 10                                 |    |
| Figure S 6: $^1\text{H}$ NMR spectrum of compound <b>Z-4</b> (499.9 MHz, $\text{DMSO-d}_6$ solution, 25°C). .....                                                              | 11 |
| Figure S 7: $^1\text{H}$ NMR spectrum of compound photostationary mixture of <b>E-4</b> and <b>Z-4</b> (499.9 MHz,<br>$\text{DMSO-d}_6$ solution, 25°C). .....                 | 12 |
| Figure S 8: $^1\text{H}$ NMR spectrum of compound <b>Z-5</b> (499.9 MHz, $\text{DMSO-d}_6$ solution, 25°C). .....                                                              | 13 |
| Figure S 9: $^1\text{H}$ NMR spectrum of compound photostationary mixture of <b>E-5</b> and <b>Z-5</b> (499.9 MHz,<br>$\text{DMSO-d}_6$ solution, 25°C). .....                 | 14 |
| Figure S 10: $^1\text{H}$ NMR spectrum of compound <b>Z-6</b> (499.9 MHz, $\text{DMSO-d}_6$ solution, 25°C). .....                                                             | 15 |
| Figure S 11: $^1\text{H}$ NMR spectrum of compound photostationary mixture of <b>E-6</b> and <b>Z-6</b> (499.9 MHz,<br>$\text{DMSO-d}_6$ solution, 25°C). .....                | 16 |
| Figure S 12: $^1\text{H}$ NMR spectrum of compound <b>Z-7</b> (499.9 MHz, $\text{DMSO-d}_6$ solution, 25°C). .....                                                             | 17 |
| Figure S 13: $^1\text{H}$ NMR spectrum of compound photostationary mixture of <b>E-7</b> and <b>Z-7</b> (499.9 MHz,<br>$\text{DMSO-d}_6$ solution, 25°C). .....                | 18 |
| Figure S 14: $^1\text{H}$ NMR spectrum of compound <b>8</b> (499.9 MHz, $\text{CD}_3\text{OD}/\text{CH}_3\text{OH}$ (1:1) solution, solvent<br>suppression used, 25°C). .....  | 19 |
| Figure S 15: $^{13}\text{C}$ NMR spectrum of compound <b>8</b> (75 MHz, $\text{CDCl}_3$ solution, 25°C). .....                                                                 | 20 |
| Figure S 16: ROESY spectrum of compound <b>8</b> (499.9 MHz, $\text{CDCl}_3$ solution, 25°C). .....                                                                            | 21 |
| Figure S 17: $^1\text{H}$ NMR spectrum of compound <b>10</b> (399.8 MHz, $\text{DMSO-d}_6$ solution, 25°C). .....                                                              | 22 |
| Figure S 18: $^{13}\text{C}$ NMR spectrum of compound <b>10</b> (75 MHz, $\text{DMSO-d}_6$ solution, 25°C). .....                                                              | 23 |
| Figure S 19: NOESY spectrum of compound <b>10</b> (399.8 MHz, $\text{DMSO-d}_6$ solution, 25°C). .....                                                                         | 24 |
| Figure S 17: $^1\text{H}$ NMR spectrum of compound <b>12</b> (270.2 MHz, $\text{CDCl}_3$ solution, 25°C). .....                                                                | 25 |
| Figure S 18: $^{13}\text{C}$ NMR spectrum of compound <b>12</b> (67.9 MHz, $\text{CDCl}_3$ solution, 25°C). .....                                                              | 26 |
| Figure S 17: $^1\text{H}$ NMR spectrum of compound <b>13</b> (399.9 MHz, $\text{CD}_3\text{OD}$ solution, 25°C). .....                                                         | 27 |
| Figure S 18: $^{13}\text{C}$ NMR spectrum of compound <b>13</b> (100.5 MHz, $\text{CD}_3\text{OD}$ solution, 25°C). .....                                                      | 28 |
| Figure S 17: $^1\text{H}$ NMR spectrum of compound <b>14</b> (270.2 MHz, $\text{CDCl}_3$ solution, 25°C). .....                                                                | 29 |
| Figure S 18: $^{13}\text{C}$ NMR spectrum of compound <b>14</b> (67.9 MHz, $\text{CDCl}_3$ solution, 25°C). .....                                                              | 30 |
| Figure S 17: $^1\text{H}$ NMR spectrum of compound <b>16</b> (270.2 MHz, $\text{CDCl}_3$ solution, 25°C). .....                                                                | 31 |
| Figure S 18: $^{13}\text{C}$ NMR spectrum of compound <b>16</b> (67.9 MHz, $\text{CDCl}_3$ solution, 25°C). .....                                                              | 32 |
| Figure S 17: $^1\text{H}$ NMR spectrum of compound <b>17</b> (399.9 MHz, $\text{CDCl}_3$ solution, 25°C). .....                                                                | 33 |
| Figure S 18: $^{13}\text{C}$ NMR spectrum of compound <b>17</b> (100.6 MHz, $\text{CDCl}_3$ solution, 25°C). .....                                                             | 34 |
| Figure S 17: $^1\text{H}$ NMR spectrum of compound <b>19</b> (399.8 MHz, $\text{CDCl}_3$ solution, 25°C). .....                                                                | 35 |
| Figure S 18: $^{13}\text{C}$ NMR spectrum of compound <b>19</b> (100.5 MHz, $\text{CDCl}_3$ solution, 25°C). .....                                                             | 36 |
| Figure S 20: $^1\text{H}$ NMR spectrum of compound <b>40</b> (499.9 MHz, $\text{CD}_3\text{OD}/\text{CDCl}_3$ (3:1) solution, 25°C).<br>.....                                  | 37 |

|                                                                                                                        |    |
|------------------------------------------------------------------------------------------------------------------------|----|
| Figure S 21: $^1\text{H}$ NMR spectrum of compound <b>43</b> (270.2 MHz, $\text{CDCl}_3$ solution, 25°C).....          | 38 |
| Figure S 22: $^{13}\text{C}$ NMR spectrum of compound <b>43</b> (67.9 MHz, $\text{CDCl}_3$ solution, 25°C).....        | 39 |
| Figure S 23: $^1\text{H}$ NMR spectrum of compound <b>44</b> (300 MHz, $\text{CDCl}_3$ solution, 25°C).....            | 40 |
| Figure S 24: $^{13}\text{C}$ NMR spectrum of compound <b>44</b> (75 MHz, $\text{CDCl}_3$ solution, 25°C).....          | 41 |
| Figure S 25: $^1\text{H}$ NMR spectrum of compound <b>45</b> (270.2 MHz, $\text{CDCl}_3$ solution, 25°C).....          | 42 |
| Figure S 26: $^1\text{H}$ NMR spectrum of compound <b>46</b> (399.8 MHz, acetone- $\text{d}_6$ solution, 25°C).....    | 43 |
| Figure S 27: $^{13}\text{C}$ NMR spectrum of compound <b>46</b> (100.5 MHz, acetone- $\text{d}_6$ solution, 25°C)..... | 44 |

**Table S1** Amide proton temperature coefficients (ppb/K) in DMSO-d<sub>6</sub>, CH<sub>3</sub>OH:CD<sub>3</sub>OD (1:1), H<sub>2</sub>O:D<sub>2</sub>O (1:1), and CDCl<sub>3</sub> solution.

| Residue                         | DMSO             | MeOH               | DMSO                  | MeOH                    |
|---------------------------------|------------------|--------------------|-----------------------|-------------------------|
|                                 | <b>trans-1</b>   |                    | <b>cis-1</b>          |                         |
| NH <sup>Ph/Gly</sup>            | 5.2              | 6.3                | 5.1                   | 6.8                     |
| NH <sup>CH<sub>3</sub></sup>    | 4.4              | 6.6                | 4.2                   | 6.9                     |
| NH <sup>Ala</sup>               | 4.9              | 6.9                | 5.7                   | 9.0                     |
| NH <sup>Val</sup>               | 5.7              | 7.1                | 5.9                   | 7.4                     |
|                                 | <b>trans-2</b>   |                    | <b>cis-2</b>          |                         |
| NH <sup>Ph/CH<sub>2</sub></sup> | 5.2              | 7.1                | 6.5                   | 7.4                     |
| NH <sup>CH<sub>3</sub></sup>    | 5.1              | 7.5                | 7.1                   | 7.8                     |
| NH <sup>Ala</sup>               | 6.0              | 9.1                | 8.6                   | 9.9                     |
| NH <sup>Val</sup>               | 5.4              | 7.7                | 7.2                   | 9.4                     |
|                                 | <b>trans-3</b>   |                    | <b>cis-3</b>          |                         |
| NH <sup>Ph/CH<sub>2</sub></sup> | 5.5              | 7.5                | 5.7                   | 8.2                     |
| NH <sup>CH<sub>3</sub></sup>    | 5.6              | 7.5                | 5.3                   | 7.6                     |
| NH <sup>Ala</sup>               | 5.7              | 7.2                | 5.6                   | 8.7                     |
| NH <sup>Val</sup>               | 5.3              | 7.8                | 5.8                   | 8.3                     |
|                                 | <b>Z-4, DMSO</b> |                    | <b>E-4, DMSO</b>      |                         |
| NH <sup>Ala</sup>               | 4.7              |                    | 4.7                   |                         |
| NH <sup>thio</sup>              | 5.2              |                    | 5.1                   |                         |
| NH <sup>Val</sup>               | 5.5              |                    | 7.3                   |                         |
|                                 | <b>Z-5, DMSO</b> |                    | <b>E-5, DMSO</b>      |                         |
| NH <sup>Ala</sup>               | 4.7              |                    | 4.7                   |                         |
| NH <sup>thio</sup>              | 5.2              |                    | 5.3                   |                         |
| NH <sup>Val</sup>               | 5.4              |                    | 5.1                   |                         |
|                                 | <b>Z-6, DMSO</b> |                    | <b>E-6, DMSO</b>      |                         |
| NH <sup>Ala</sup>               | 5.1              |                    | 5.1                   |                         |
| NH <sup>thio</sup>              | 5.2              |                    | 5.8                   |                         |
| NH <sup>Val</sup>               | 5.5              |                    | 5.6                   |                         |
| NH <sup>Cap</sup>               | 4.4              |                    | 4.5                   |                         |
|                                 | <b>Z-7, DMSO</b> |                    | <b>E-7, DMSO</b>      |                         |
| NH <sup>Ala</sup>               | 5.1              |                    | 4.9                   |                         |
| NH <sup>thio</sup>              | 5.2              |                    | 5.5                   |                         |
| NH <sup>Val</sup>               | 5.5              |                    | 5.0                   |                         |
| NH <sup>Cap</sup>               | 4.5              |                    | 4.5                   |                         |
|                                 |                  |                    |                       |                         |
|                                 | <b>DMSO</b>      | <b>MeOH</b>        | <b>H<sub>2</sub>O</b> | <b>CDCl<sub>3</sub></b> |
|                                 | <b>8</b>         |                    |                       |                         |
| NH <sup>Gly</sup>               | 4.2              | 6.5                | 5.5                   | 5.7                     |
| NH <sup>CH<sub>3</sub></sup>    | 3.8              | 3.6                | 5.5                   | 7.3                     |
| NH <sup>Ala</sup>               | 3.2              | 3.4                | 5.1                   | 7.2                     |
| NH <sup>Val</sup>               | 5.0              | 6.1                | 2.0                   | 6.8                     |
|                                 | <b>10</b>        |                    |                       |                         |
| NH <sup>Ph-CH<sub>2</sub></sup> | 5.6              | Many conformations |                       |                         |
| NH <sup>CH<sub>3</sub></sup>    | 4.8              |                    |                       |                         |
| NH <sup>Ala</sup>               | 6.8              |                    |                       |                         |
| NH <sup>Val</sup>               | 6.0              |                    |                       |                         |

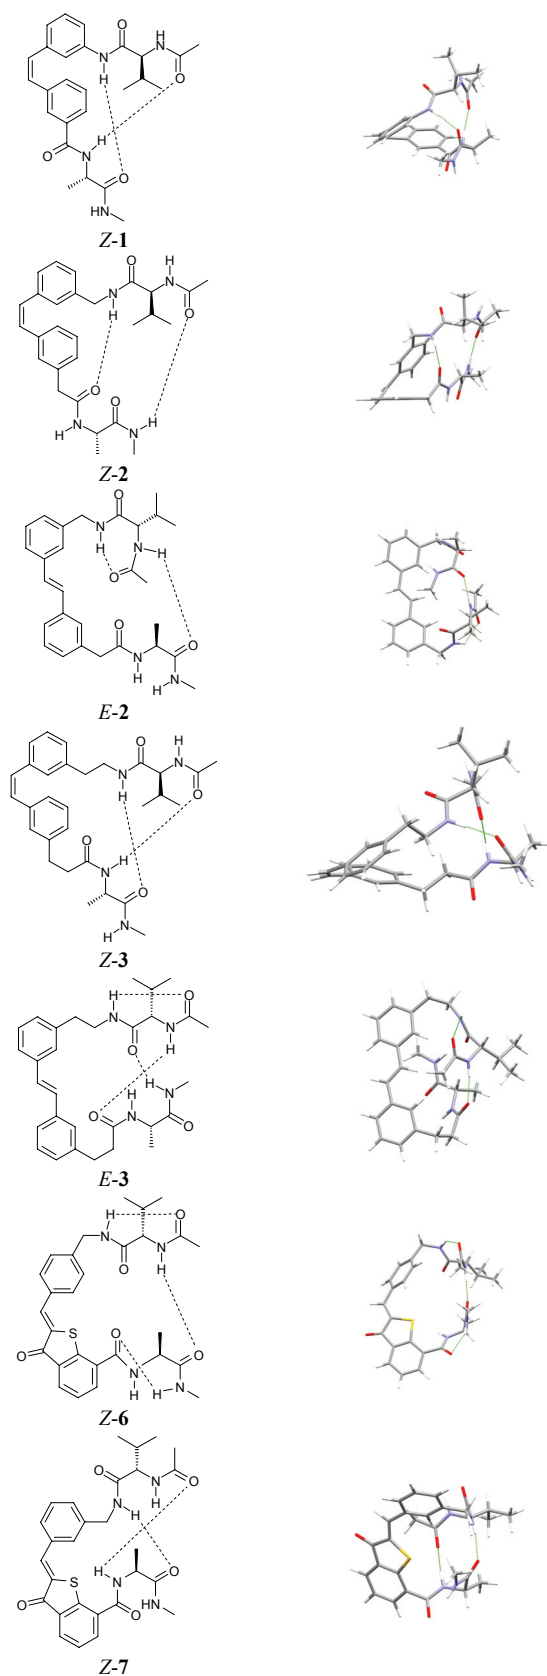

**Scheme S1.** Hydrogen bonds (dashed lines in structure formulae, green dashed lines in modelled figures) in selected low energy conformers of the photoswitchable petidomimetics. Structure formulae are drawn to show the hydrogen bonds, not the spatial arrangement. For clarity, only a single low-energy conformer is shown.

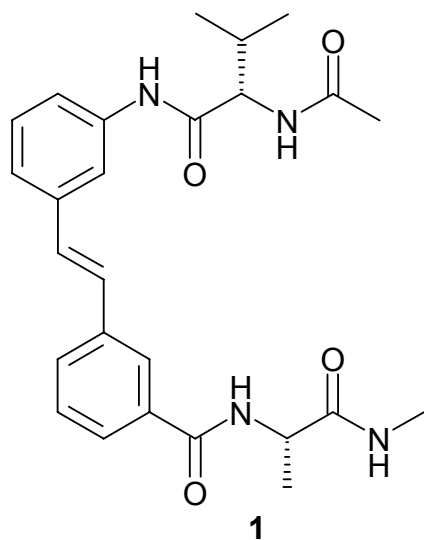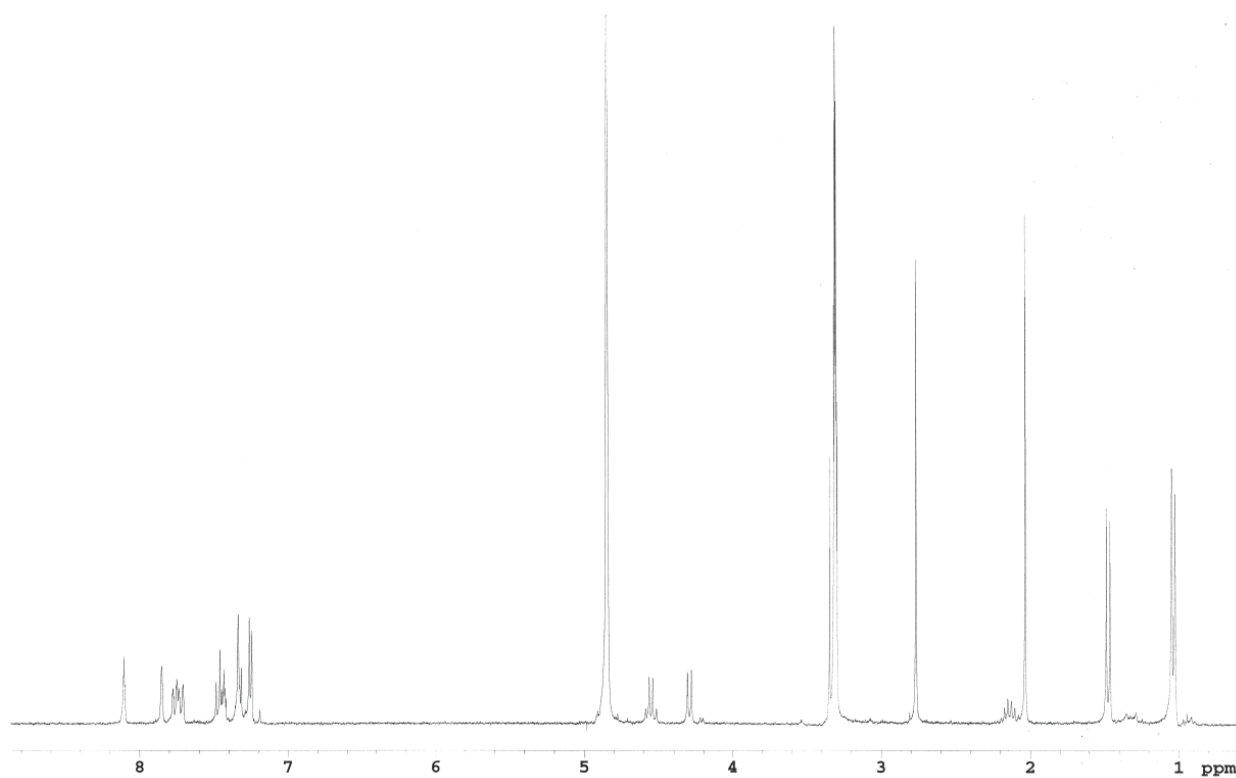

Figure S 1: <sup>1</sup>H NMR spectrum of compound E-1 (300.0 MHz, CD<sub>3</sub>OD/CH<sub>3</sub>OH (1:1) solution, 25°C).



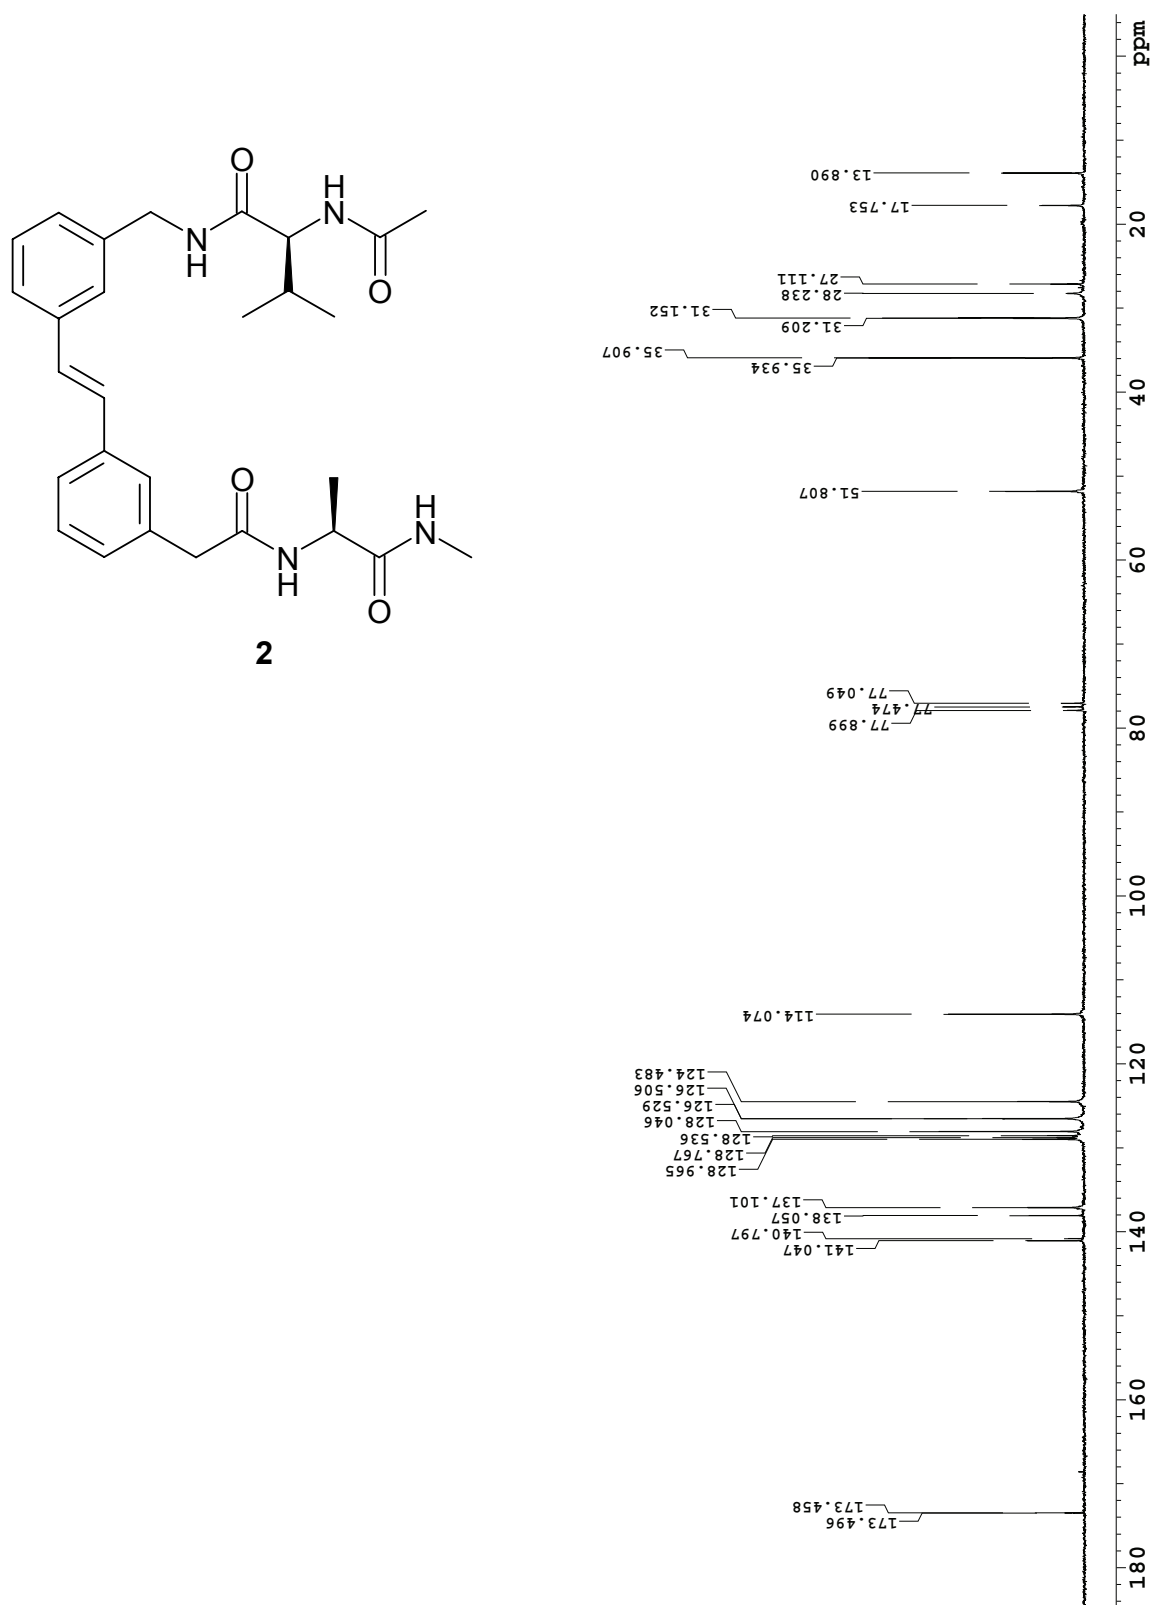Figure S 3: <sup>13</sup>C NMR spectrum of compound E-2 (75 MHz, CD<sub>3</sub>OD/CH<sub>3</sub>OH (1:1) solution, 25°C).



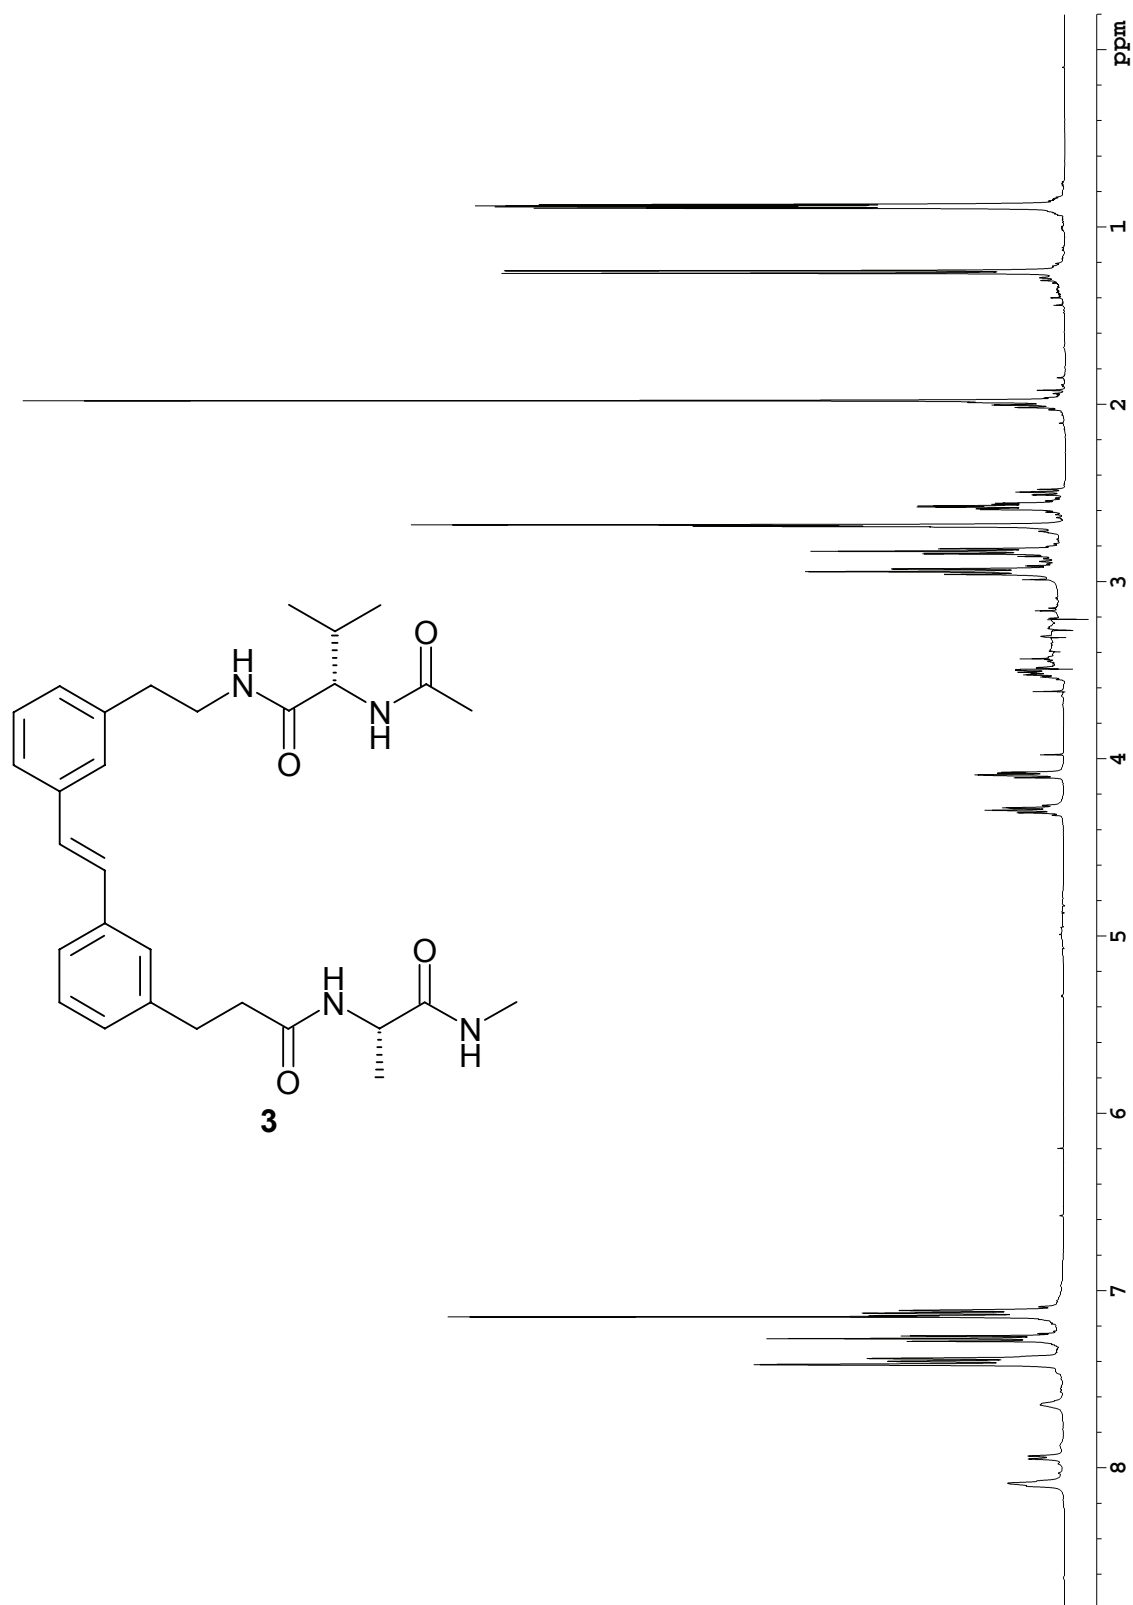

Figure S 4: <sup>1</sup>H NMR spectrum of compound E-3 (499.9 MHz, CD<sub>3</sub>OD/CH<sub>3</sub>OH (1:1) solution, solvent suppression used, 25°C).

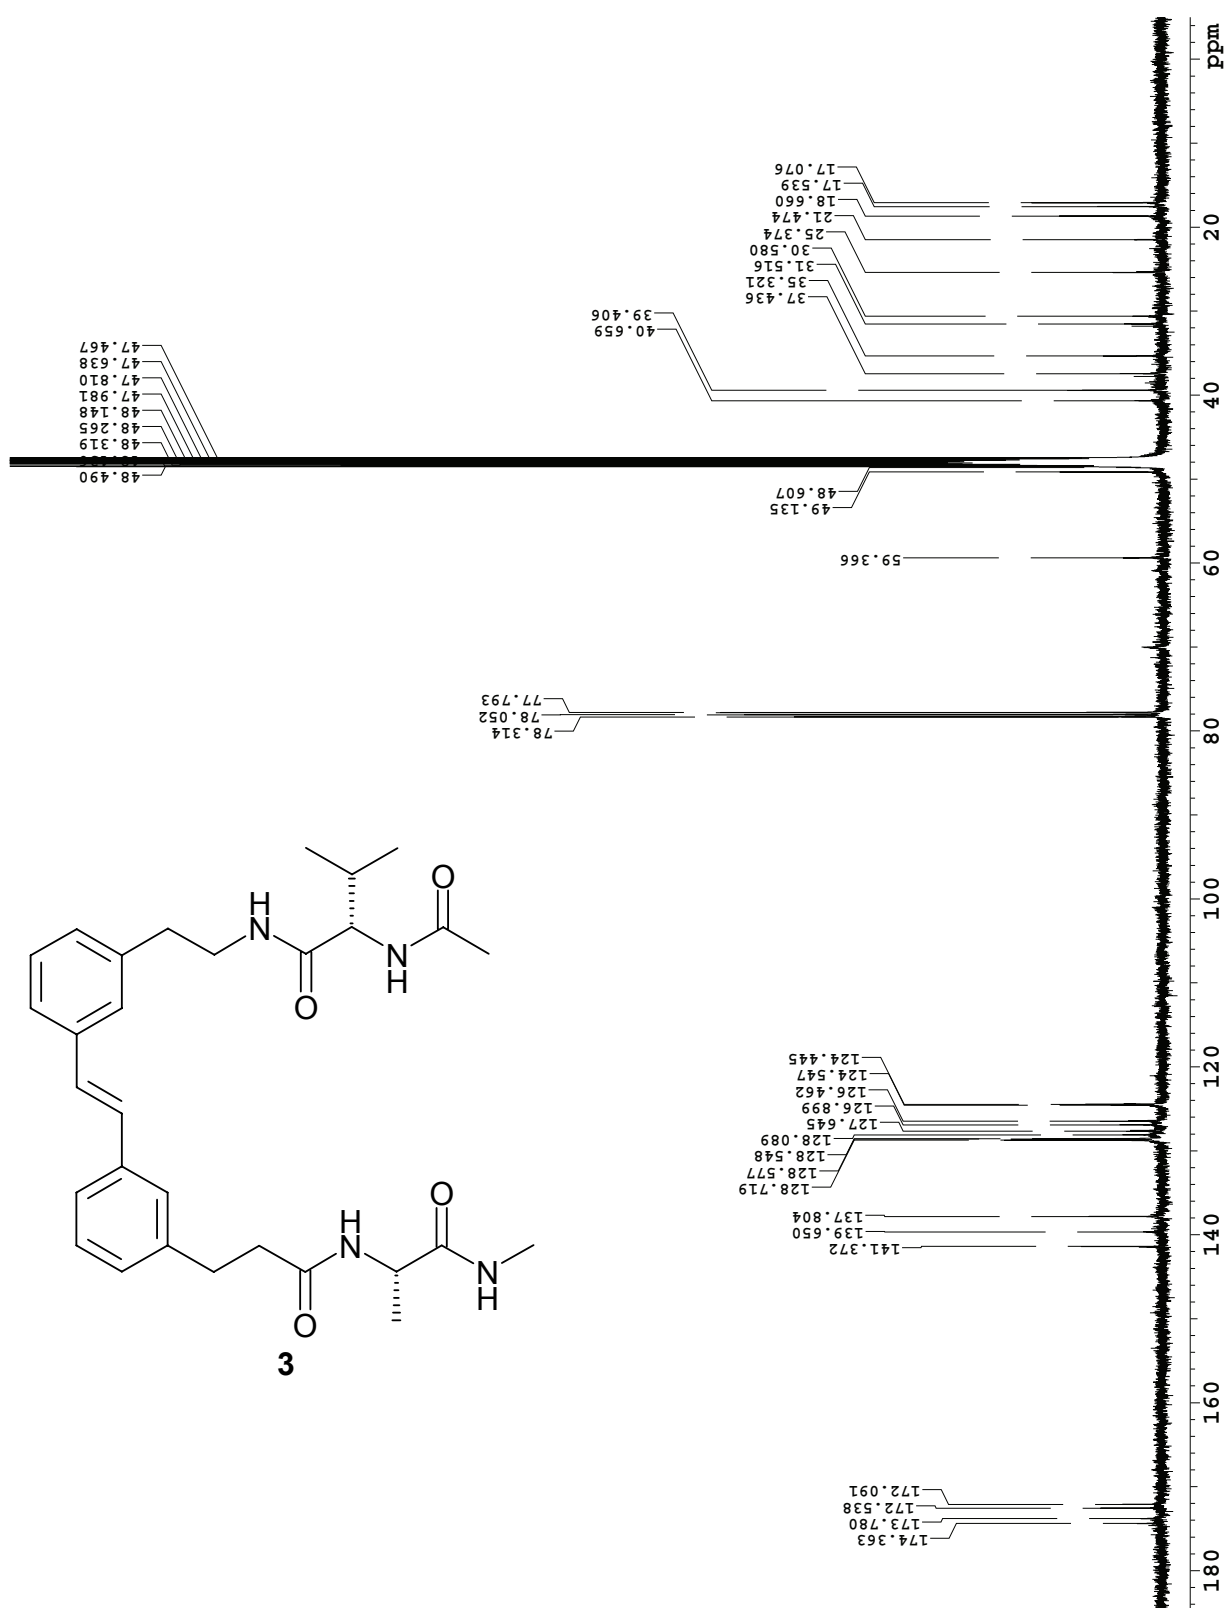Figure S 5: <sup>13</sup>C NMR spectrum of compound E-3 (75 MHz, CD<sub>3</sub>OD/CH<sub>3</sub>OH (1:1) solution, 25°C).

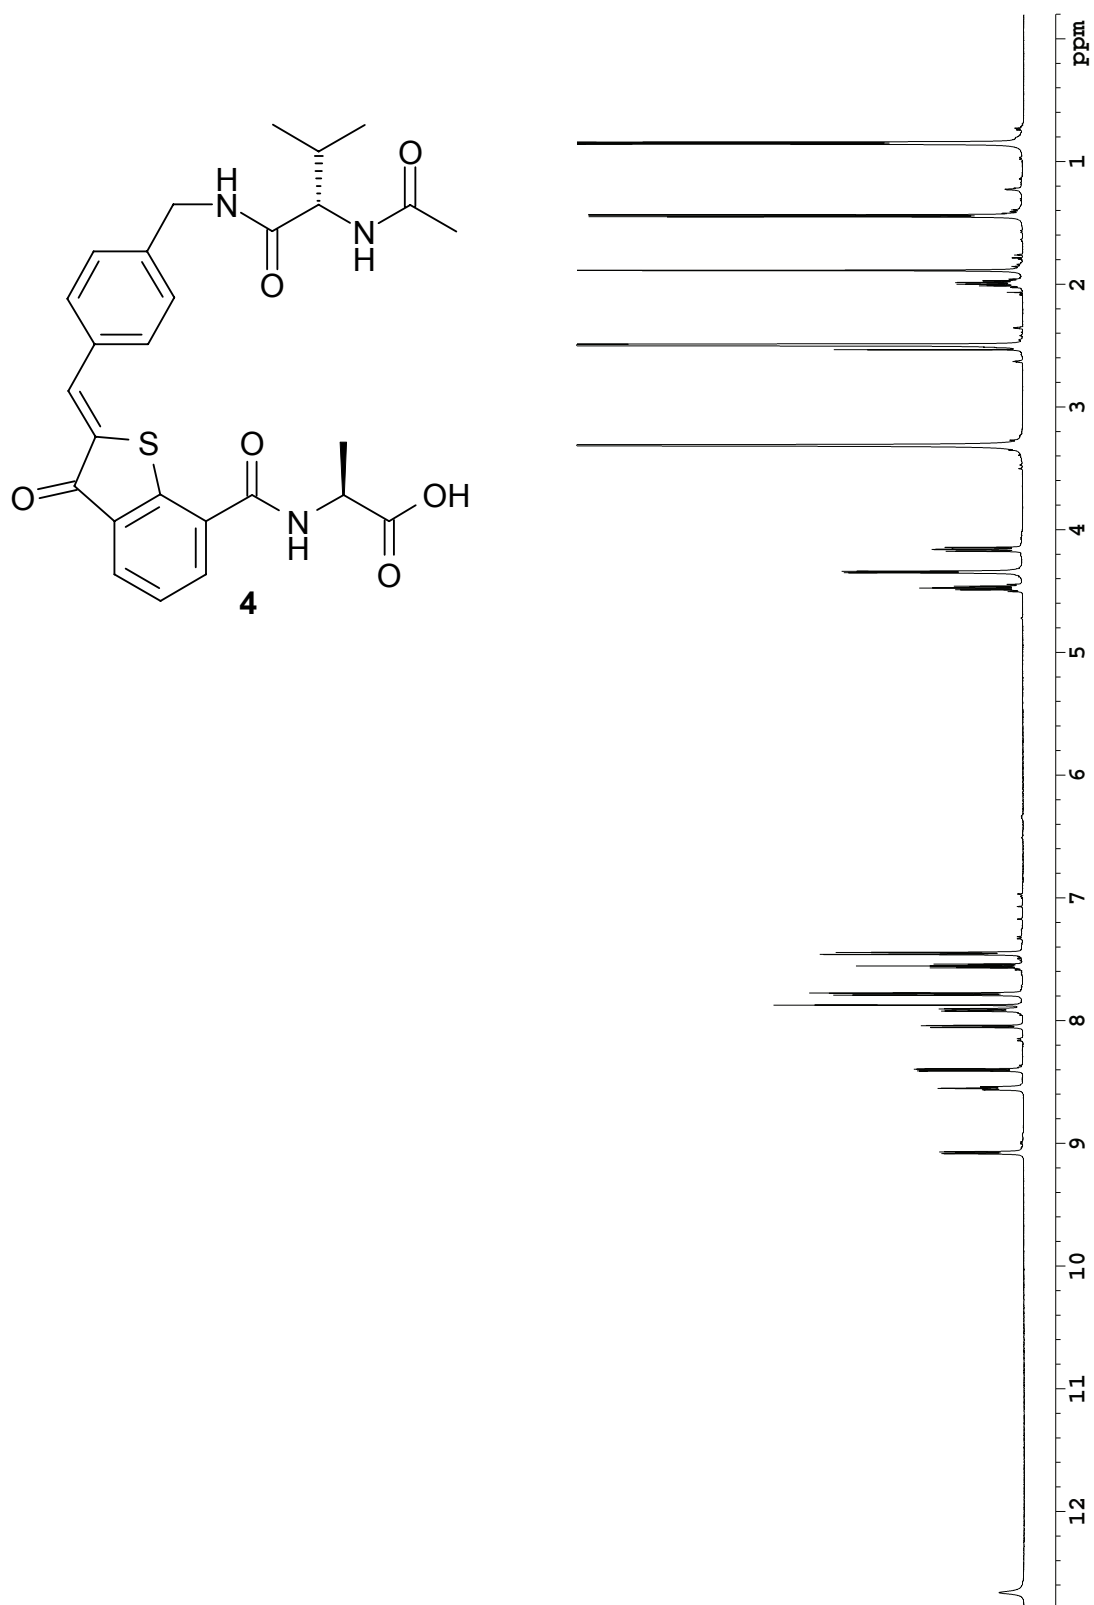Figure S 6: <sup>1</sup>H NMR spectrum of compound **Z-4** (499.9 MHz, DMSO-d<sub>6</sub> solution, 25°C).

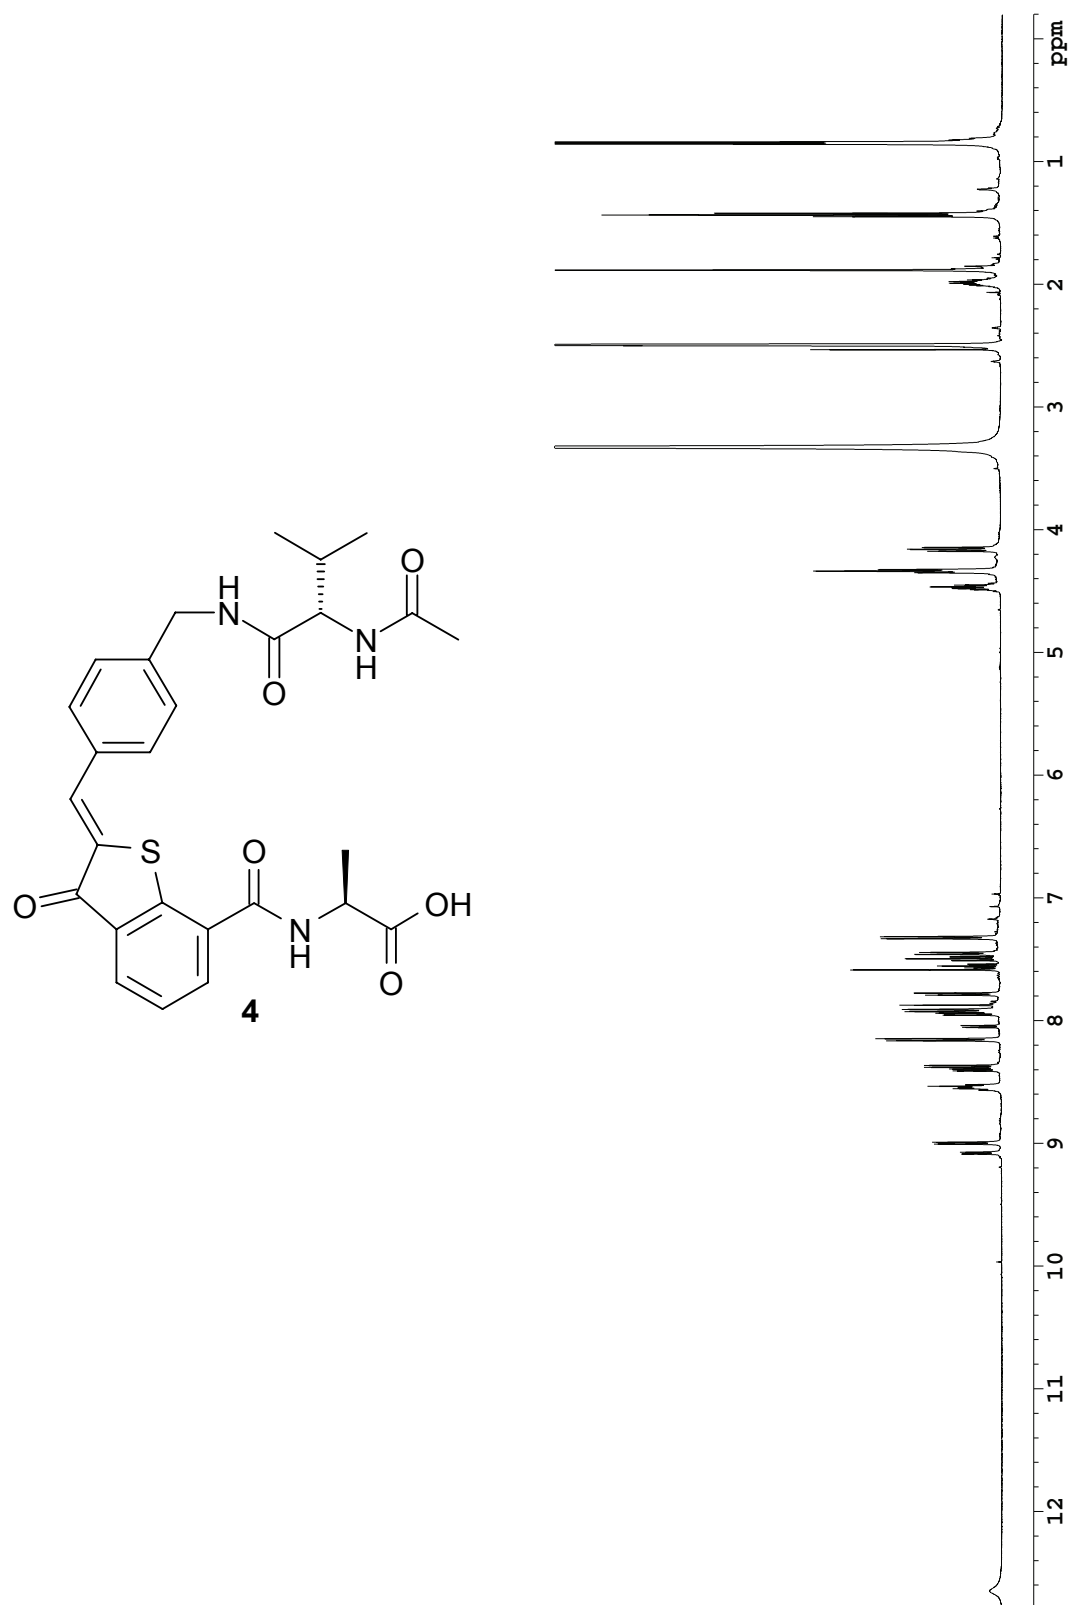

Figure S 7: <sup>1</sup>H NMR spectrum of compound photostationary mixture of **E-4** and **Z-4** (499.9 MHz, DMSO-d<sub>6</sub> solution, 25°C).

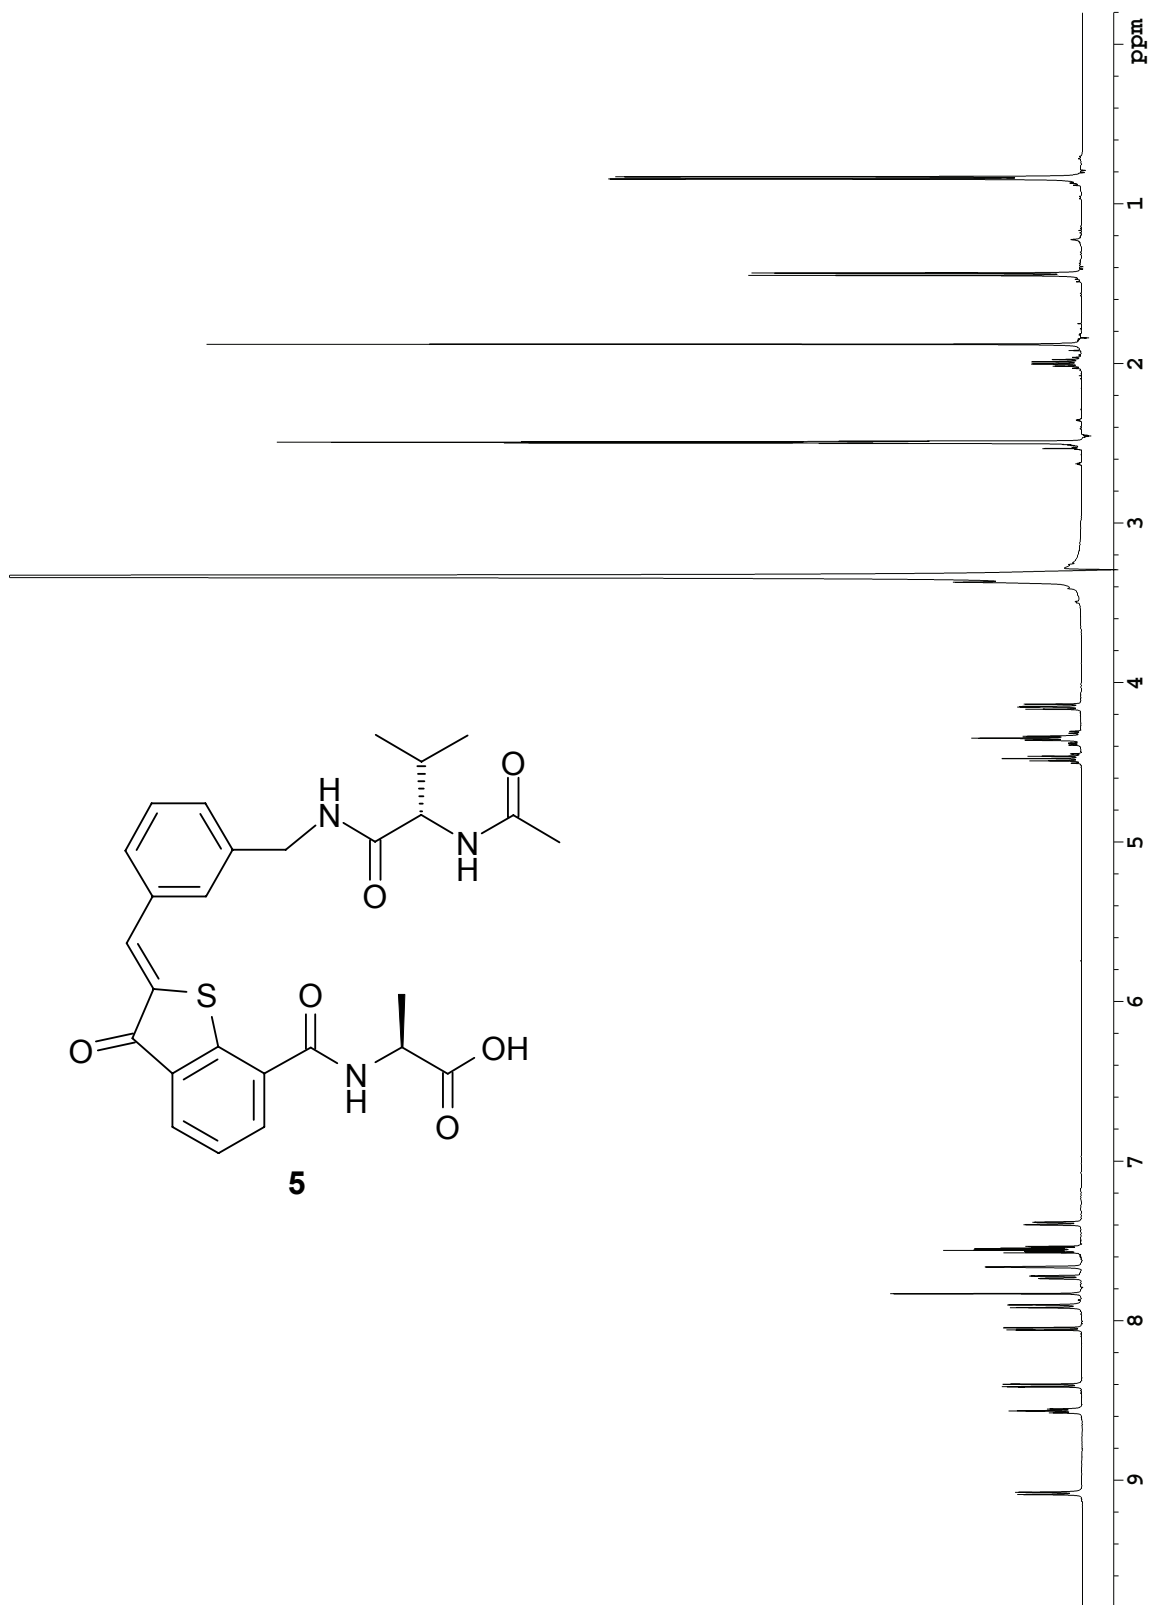Figure S 8:  $^1\text{H}$  NMR spectrum of compound **Z-5** (499.9 MHz,  $\text{DMSO-d}_6$  solution,  $25^\circ\text{C}$ ).

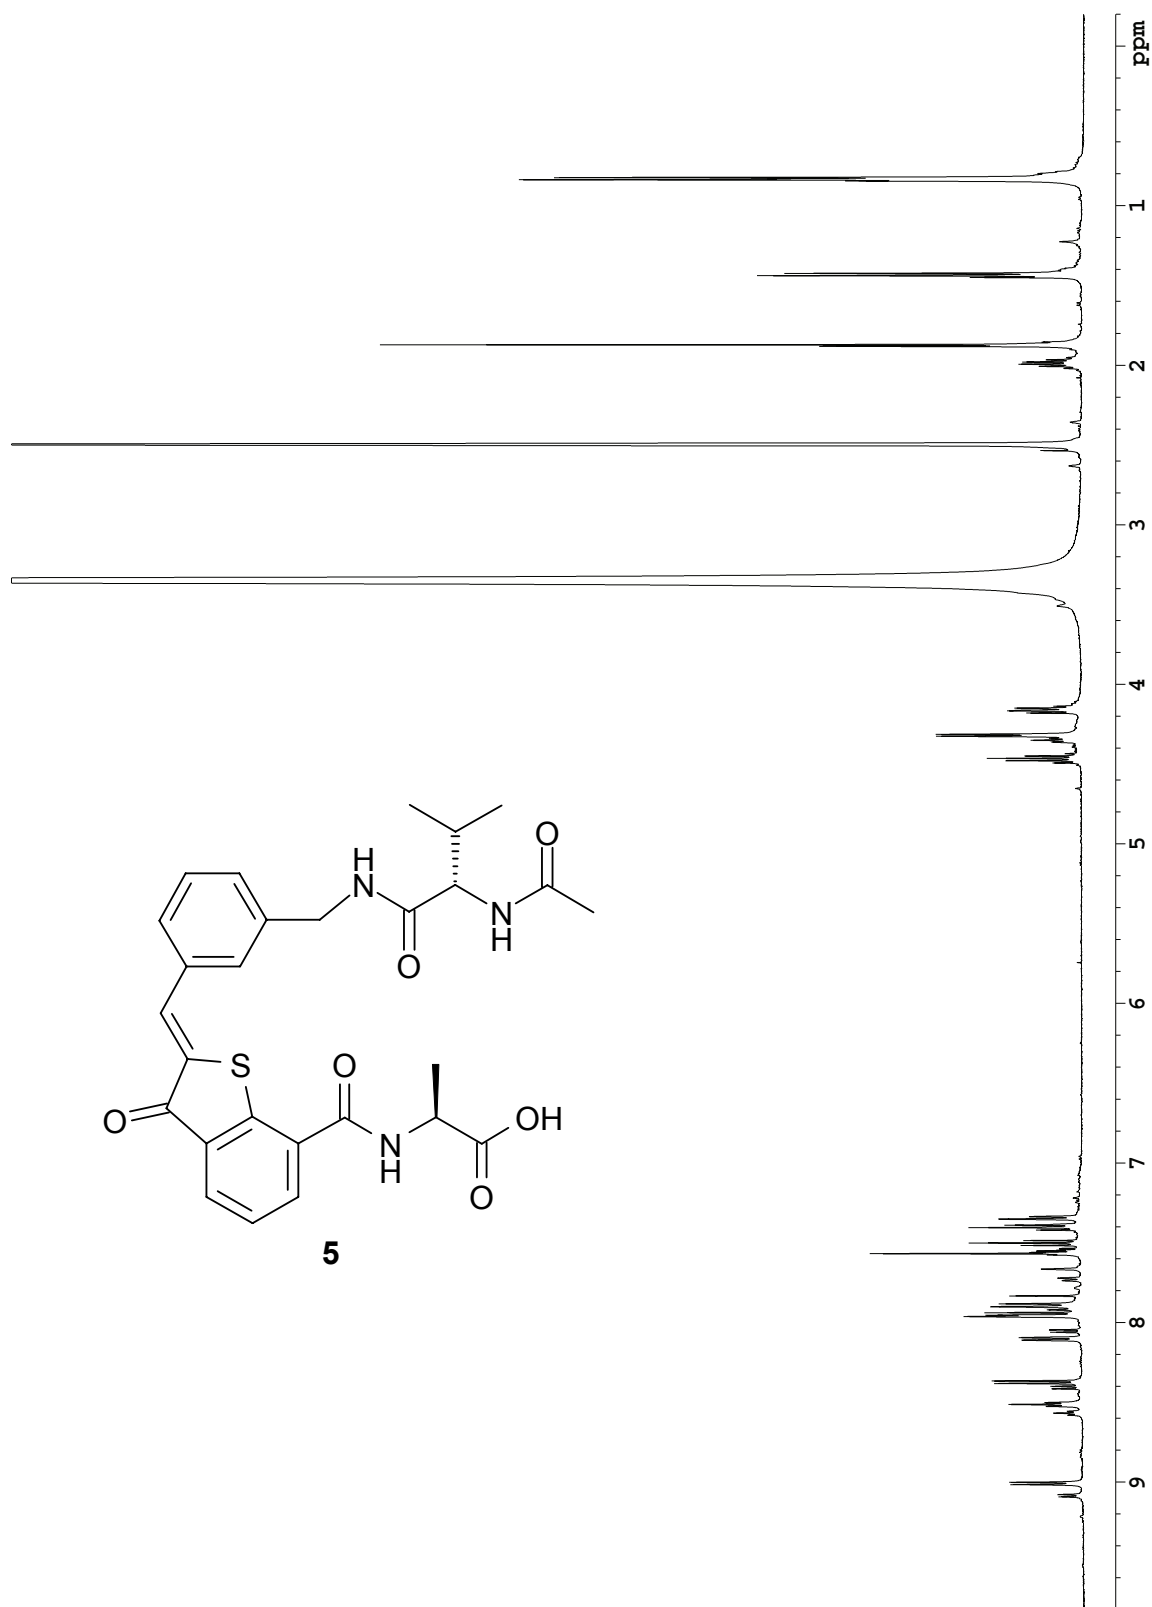

Figure S 9:  $^1\text{H}$  NMR spectrum of compound photostationary mixture of **E-5** and **Z-5** (499.9 MHz,  $\text{DMSO-d}_6$  solution,  $25^\circ\text{C}$ ).

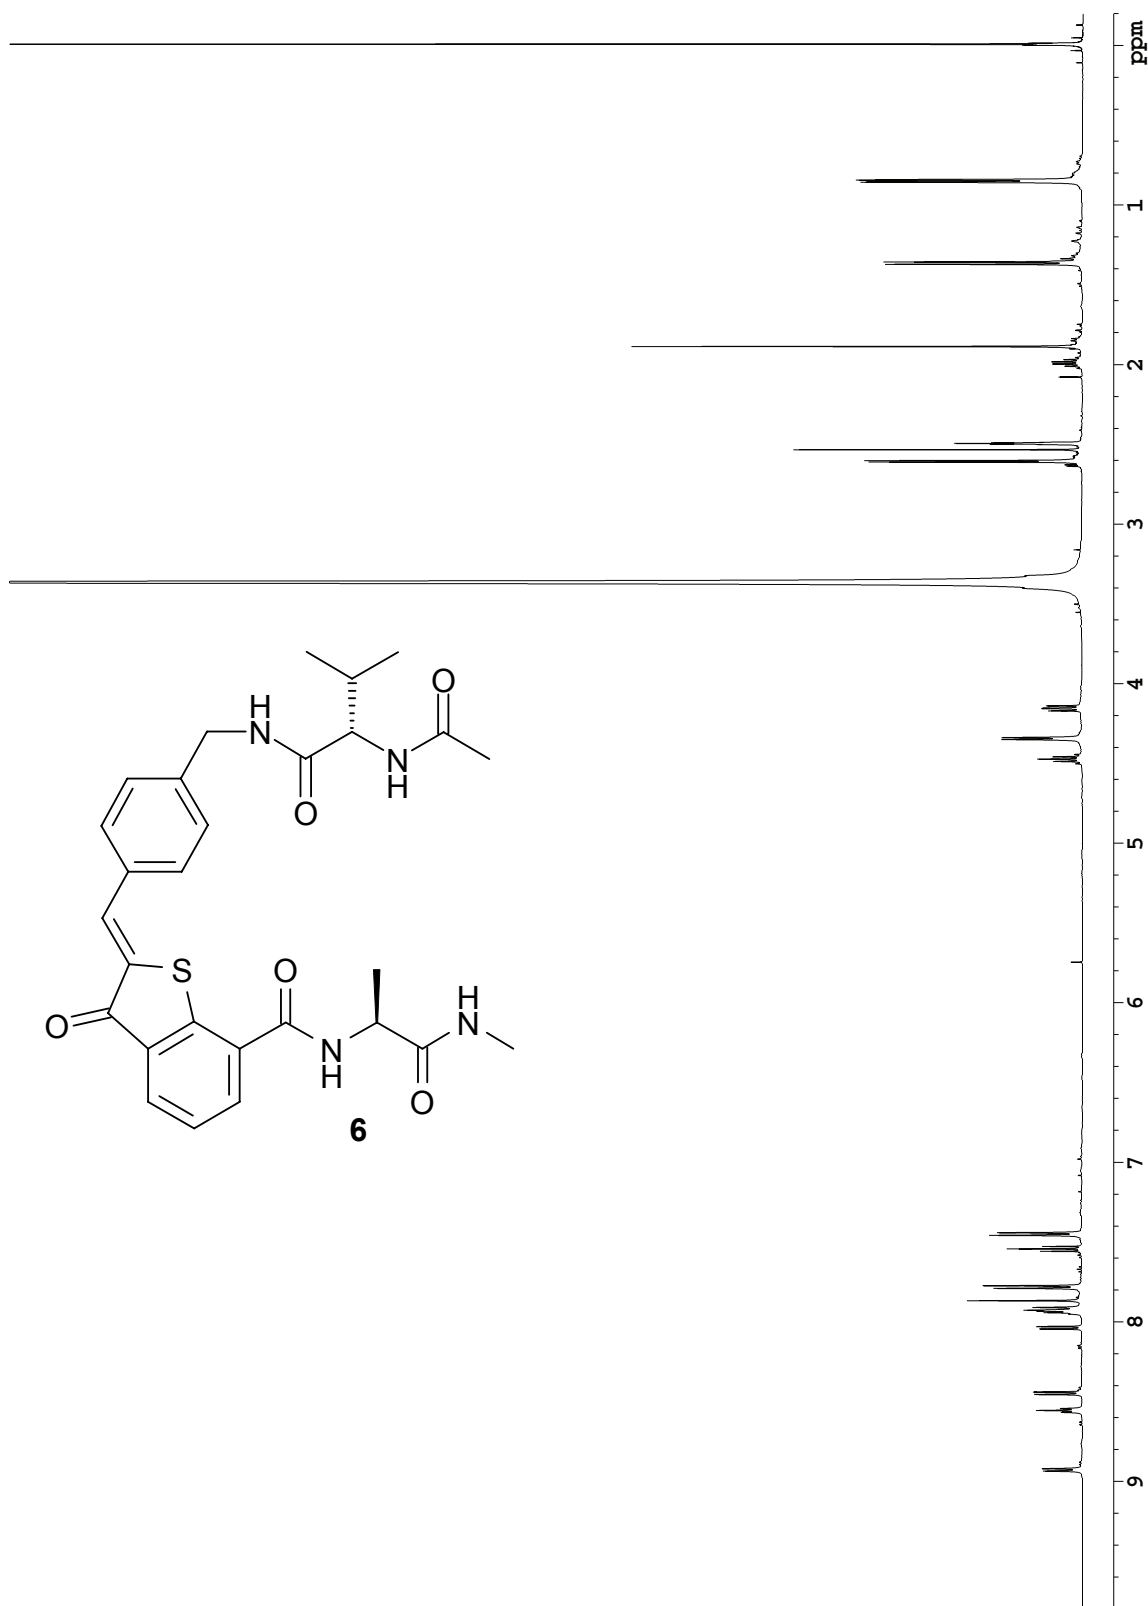Figure S 10:  $^1\text{H}$  NMR spectrum of compound **Z-6** (499.9 MHz,  $\text{DMSO-d}_6$  solution,  $25^\circ\text{C}$ ).

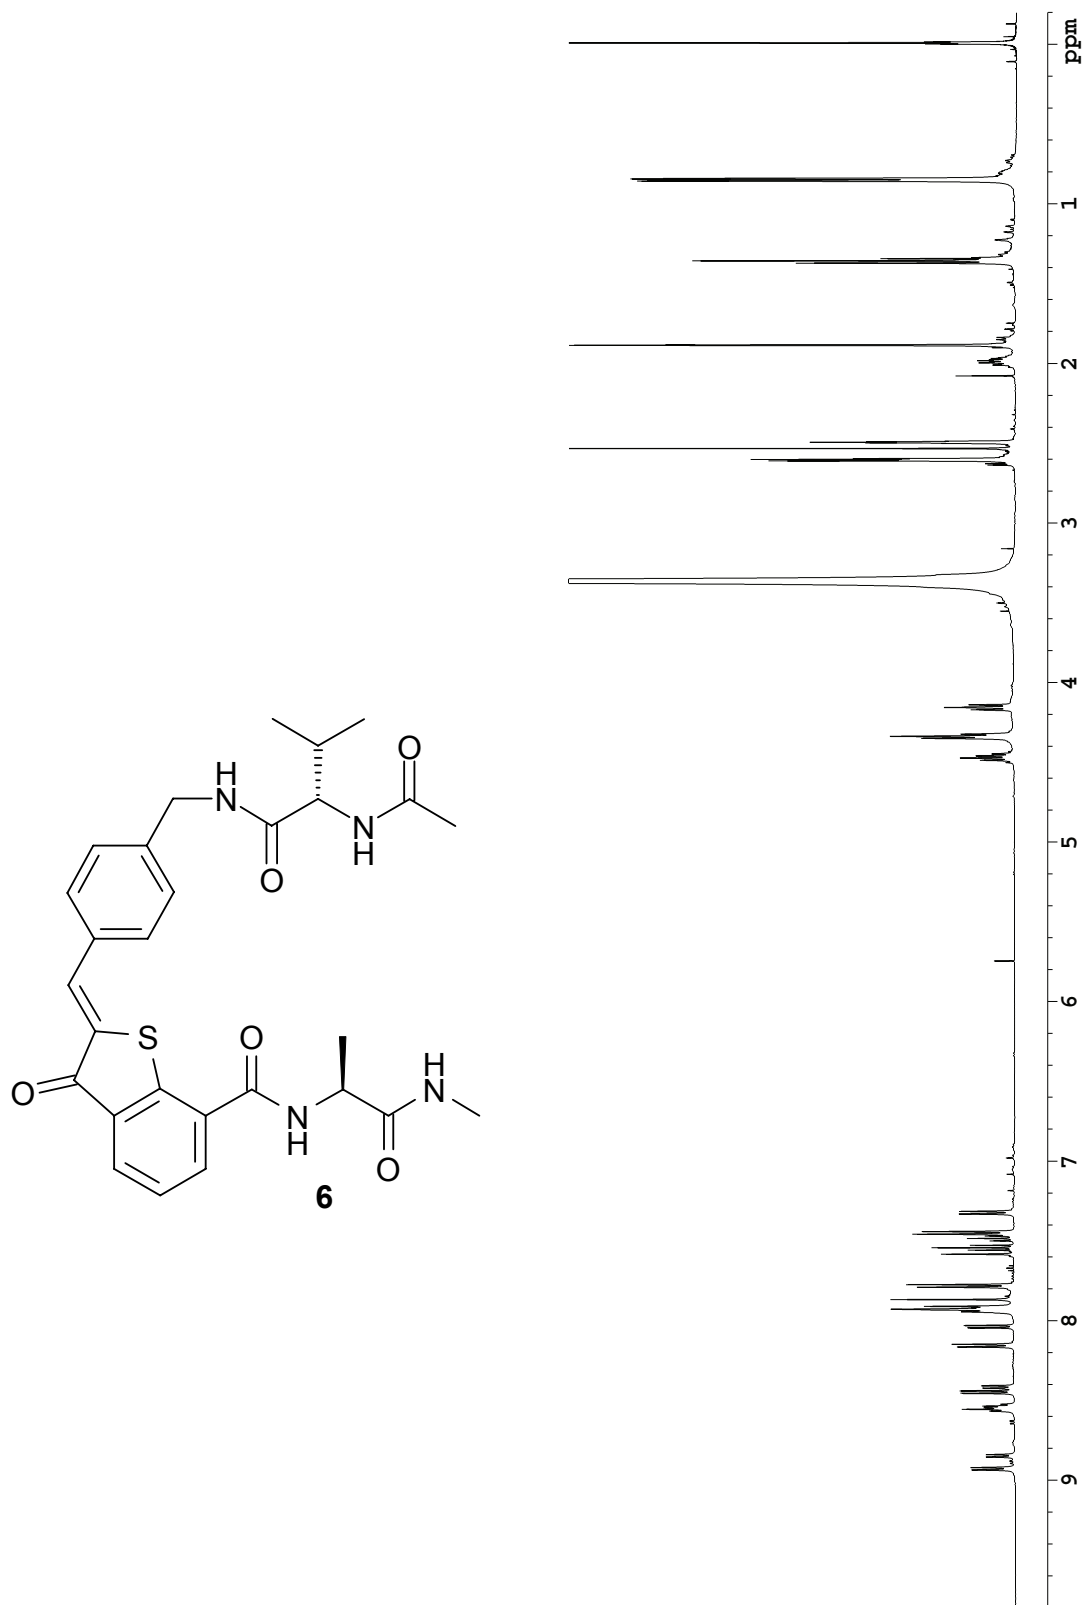

Figure S 11: <sup>1</sup>H NMR spectrum of compound photostationary mixture of **E-6** and **Z-6** (499.9 MHz, DMSO-d<sub>6</sub> solution, 25°C).



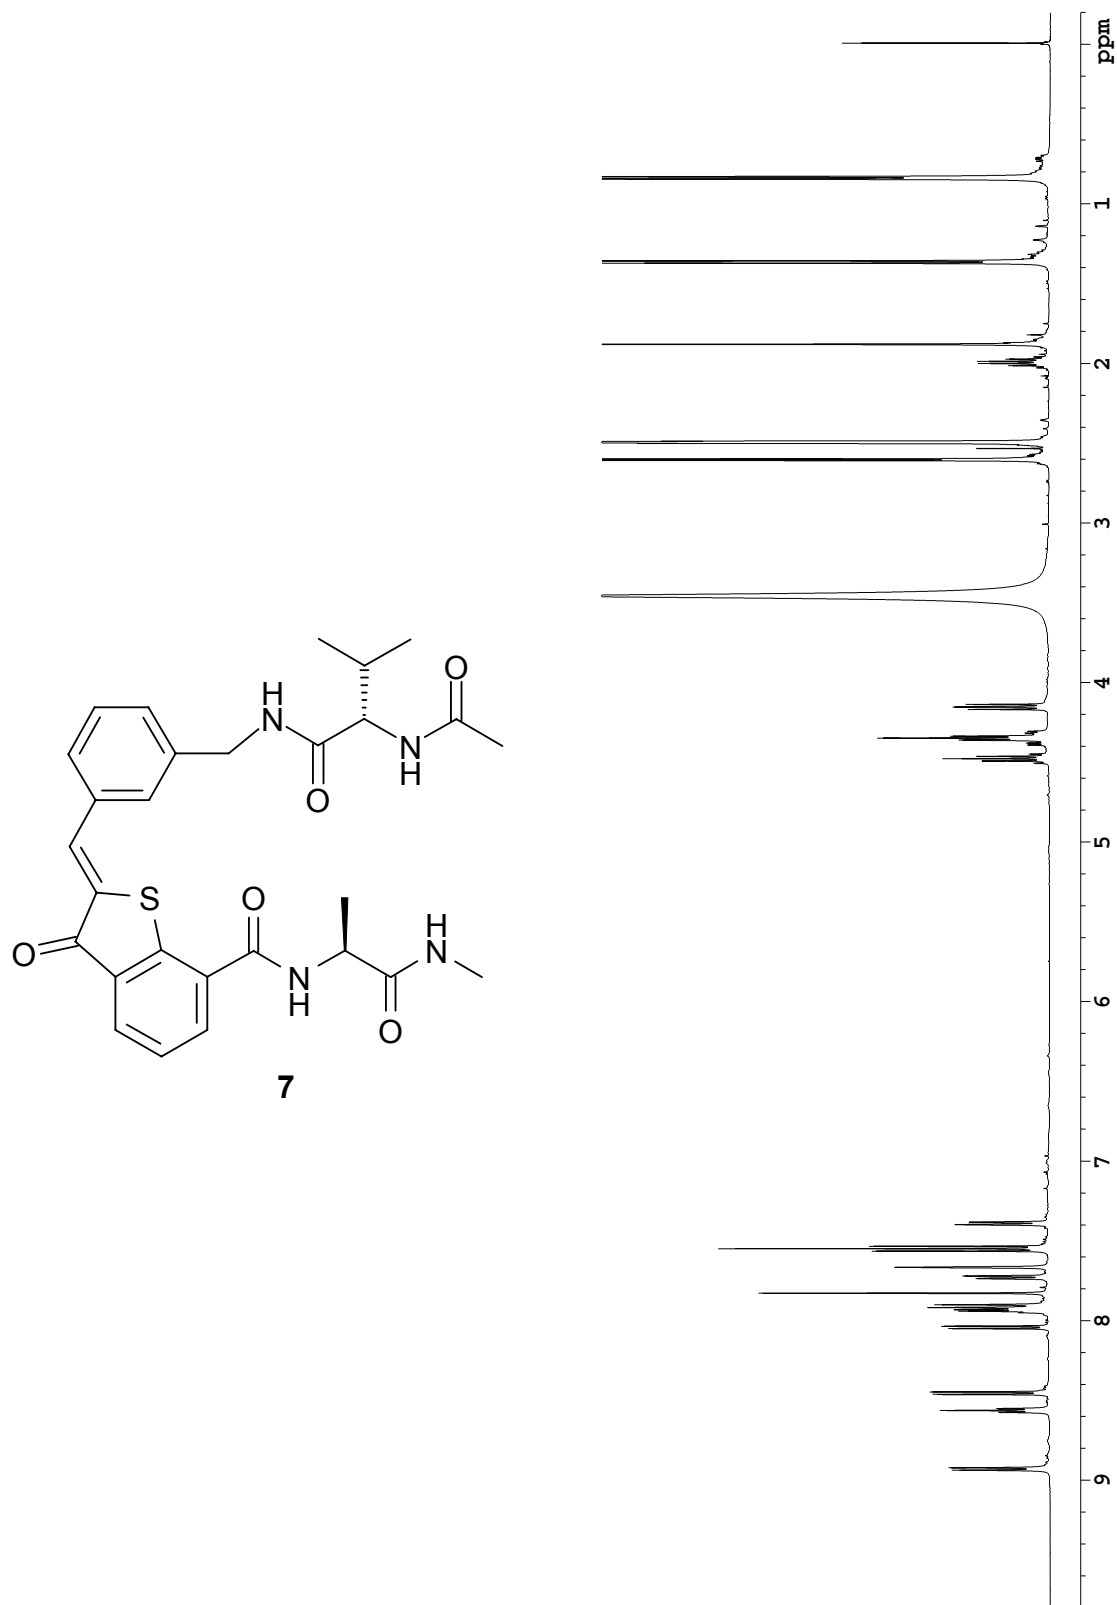Figure S 12:  $^1\text{H}$  NMR spectrum of compound **Z-7** (499.9 MHz, DMSO- $d_6$  solution, 25°C).

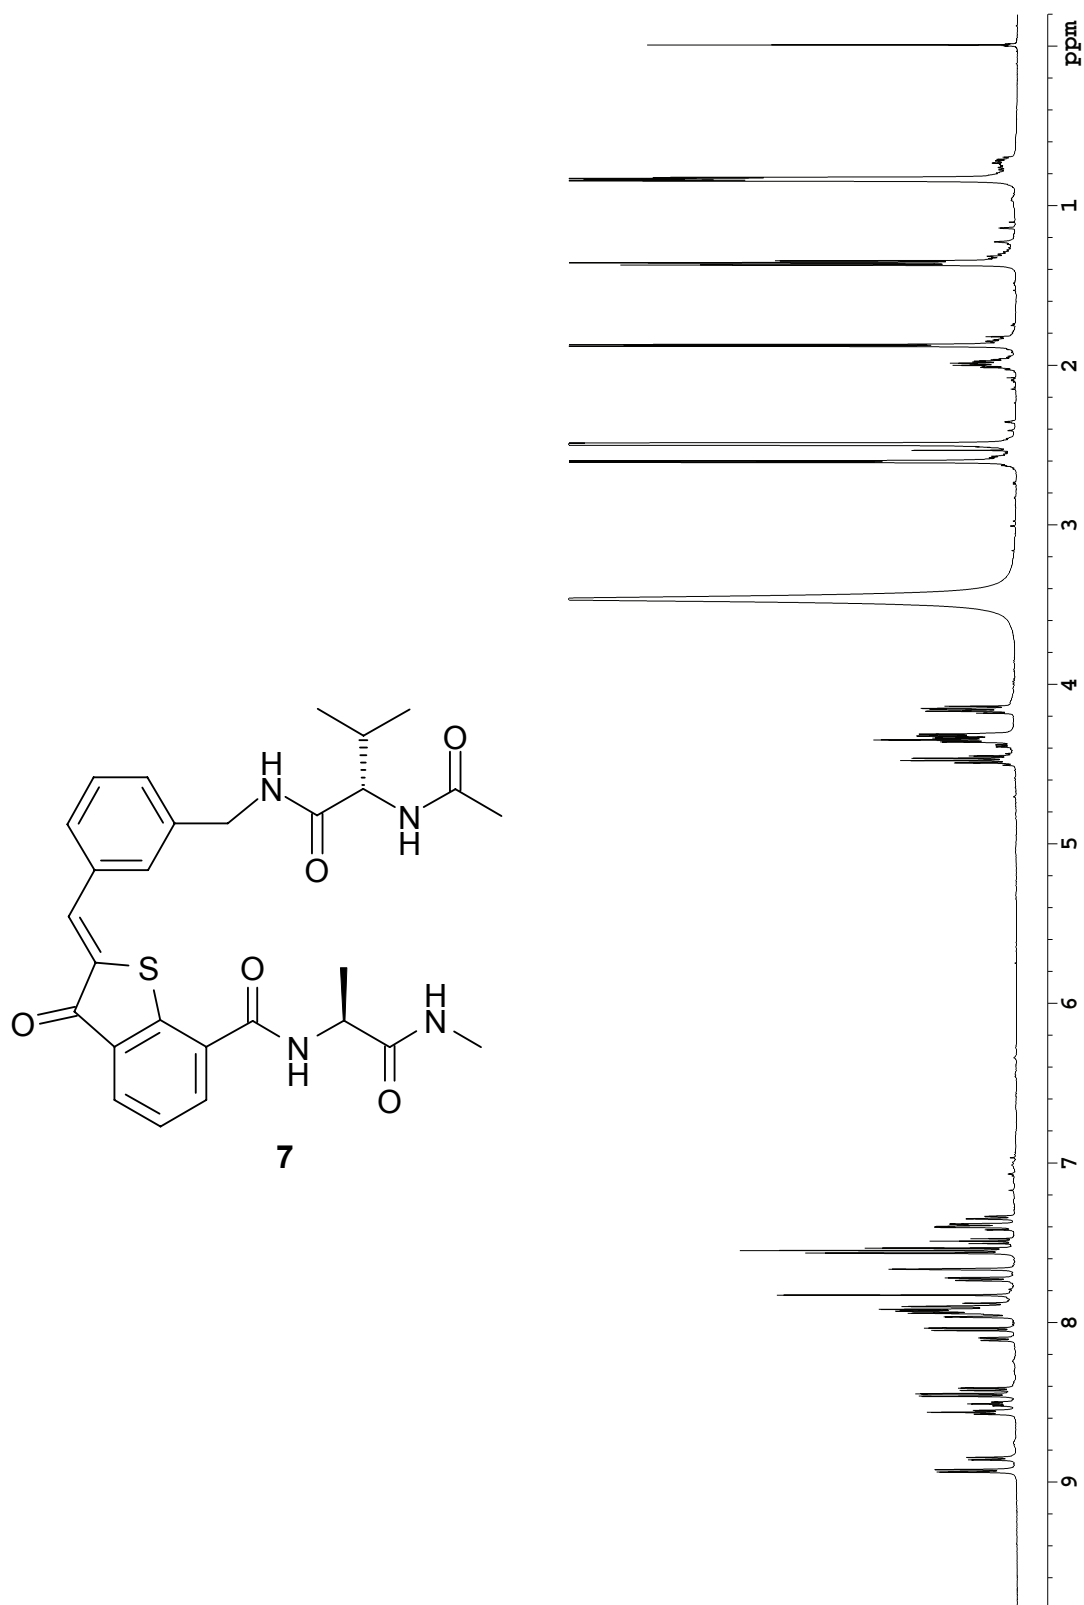

Figure S 13:  $^1\text{H}$  NMR spectrum of compound photostationary mixture of **E-7** and **Z-7** (499.9 MHz,  $\text{DMSO-d}_6$  solution,  $25^\circ\text{C}$ ).

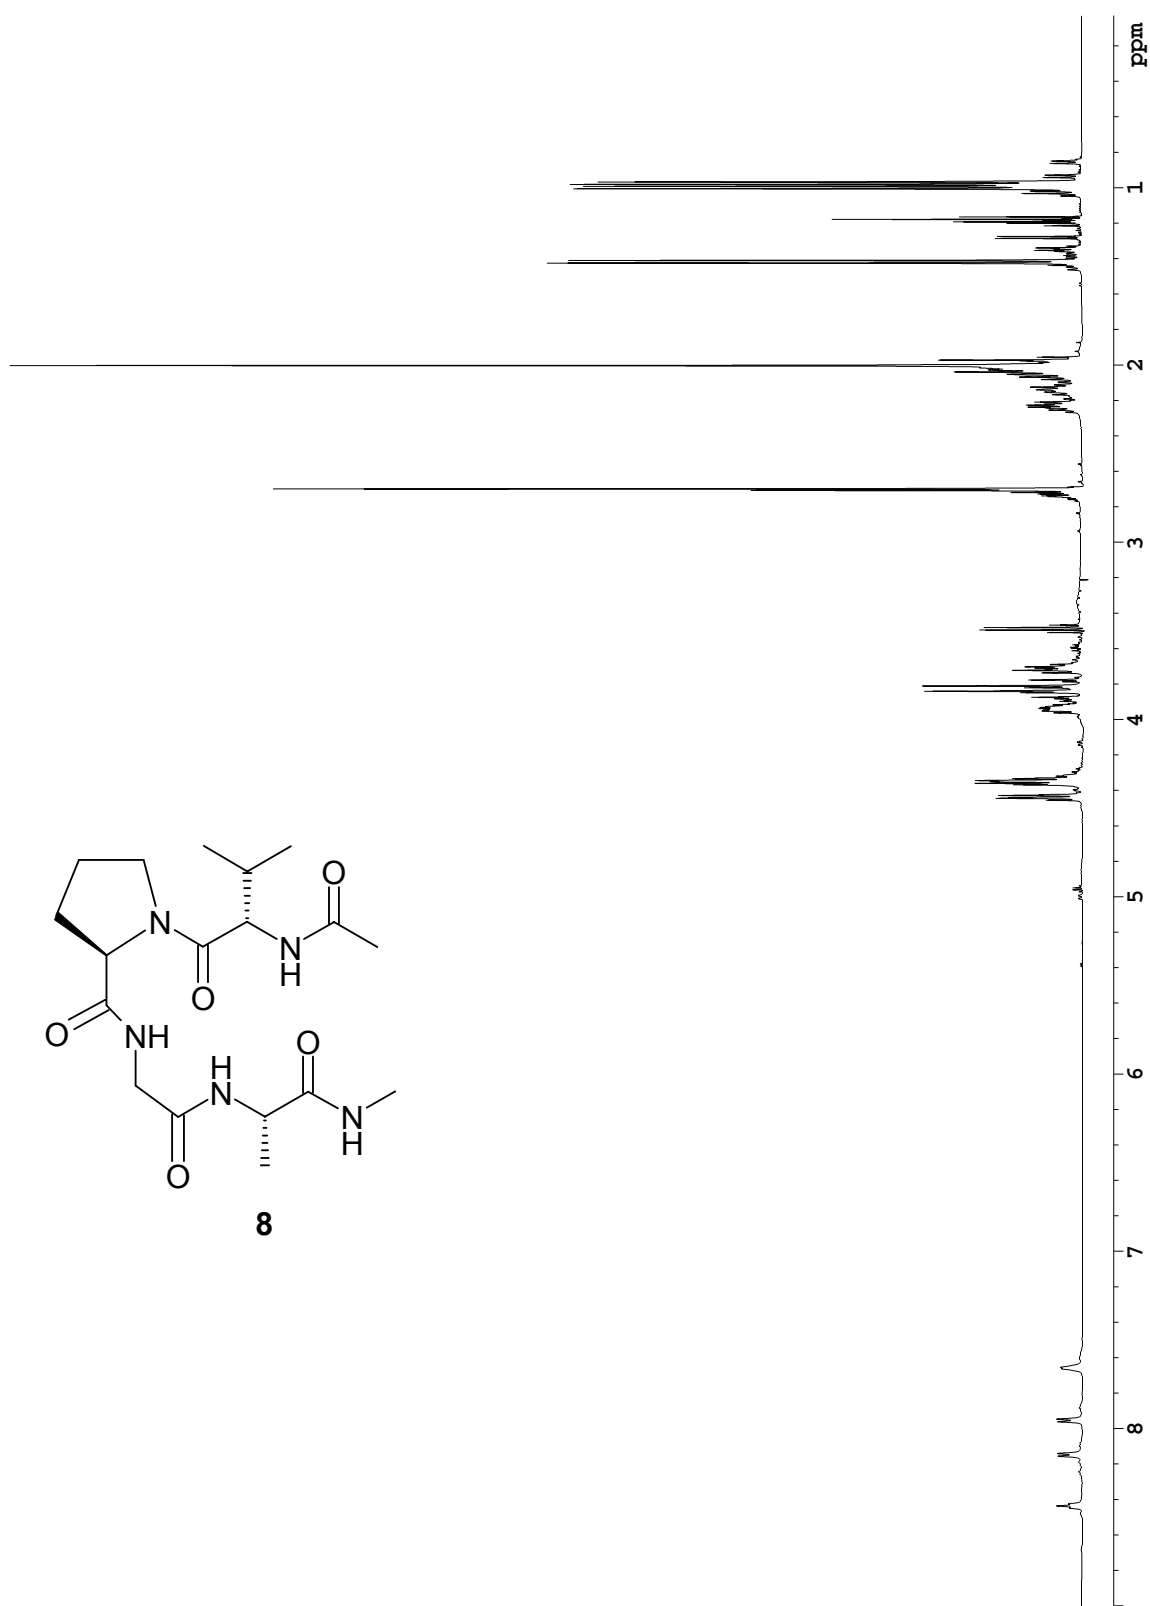

Figure S 14: <sup>1</sup>H NMR spectrum of compound **8** (499.9 MHz, CD<sub>3</sub>OD/CH<sub>3</sub>OH (1:1) solution, solvent suppression used, 25°C).

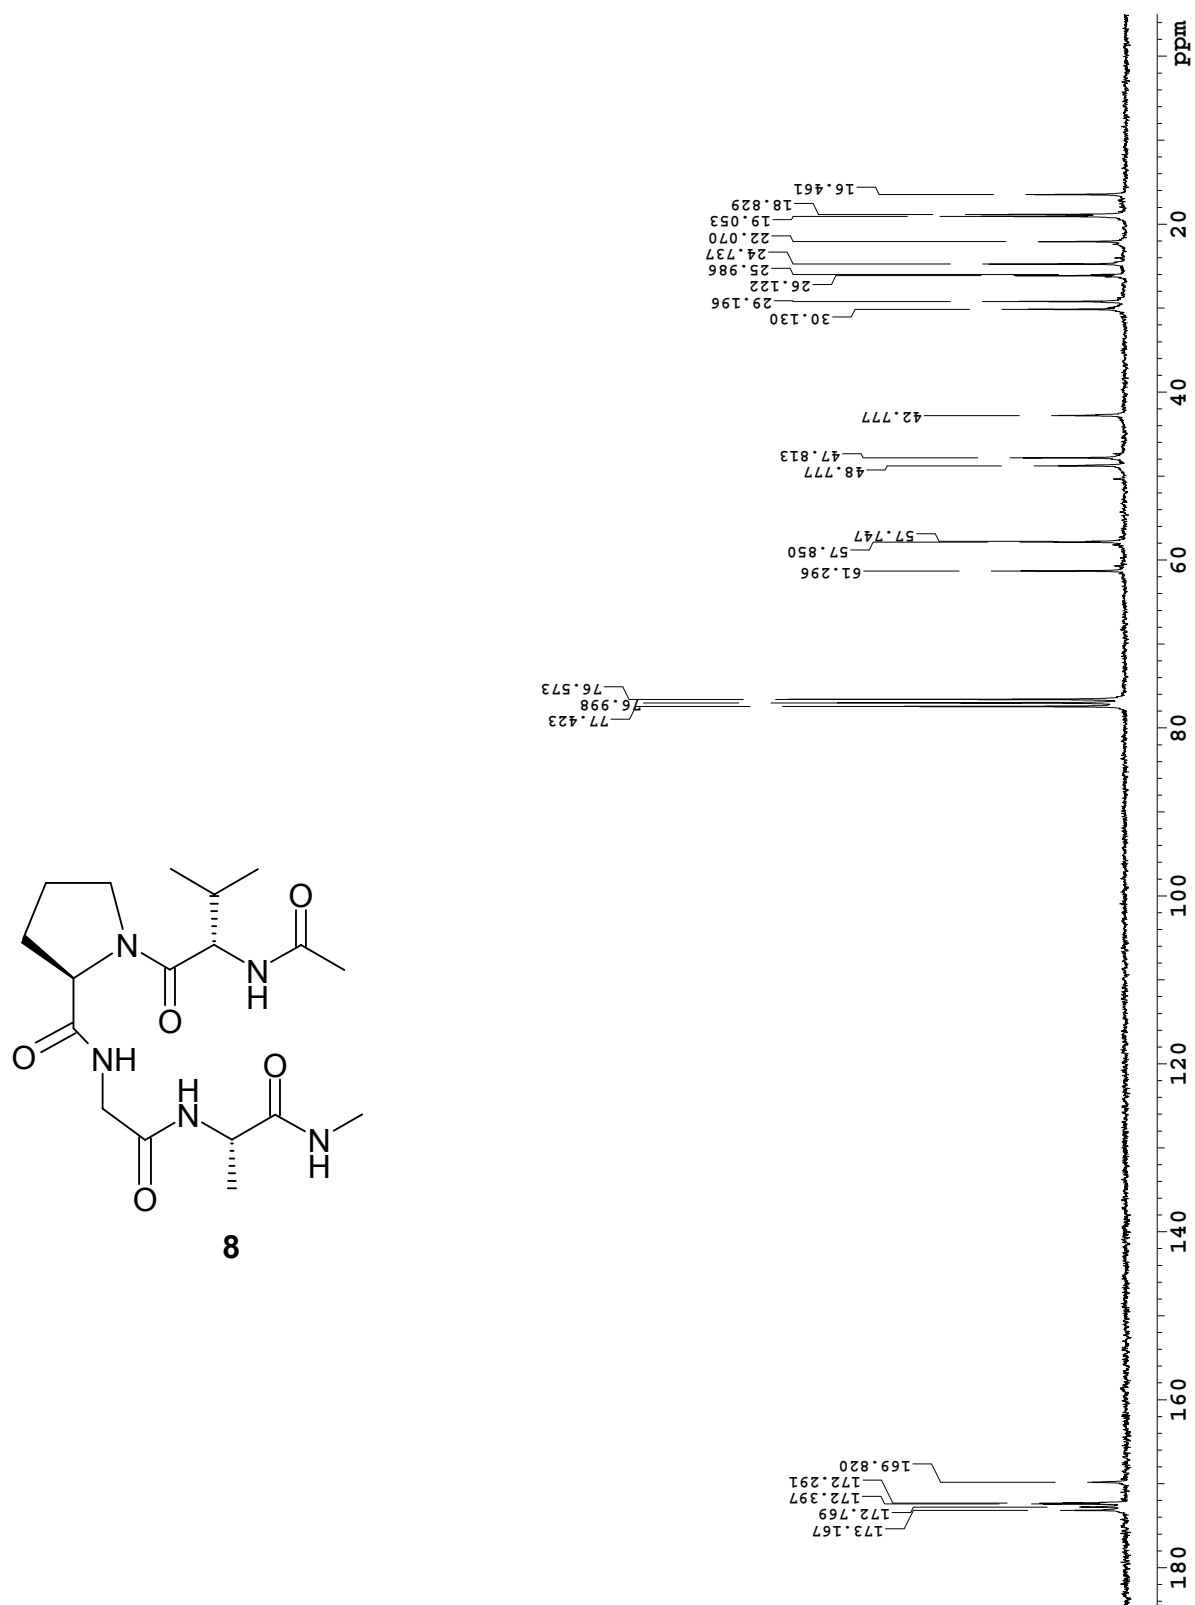Figure S 15: <sup>13</sup>C NMR spectrum of compound **8** (75 MHz, CDCl<sub>3</sub> solution, 25°C).

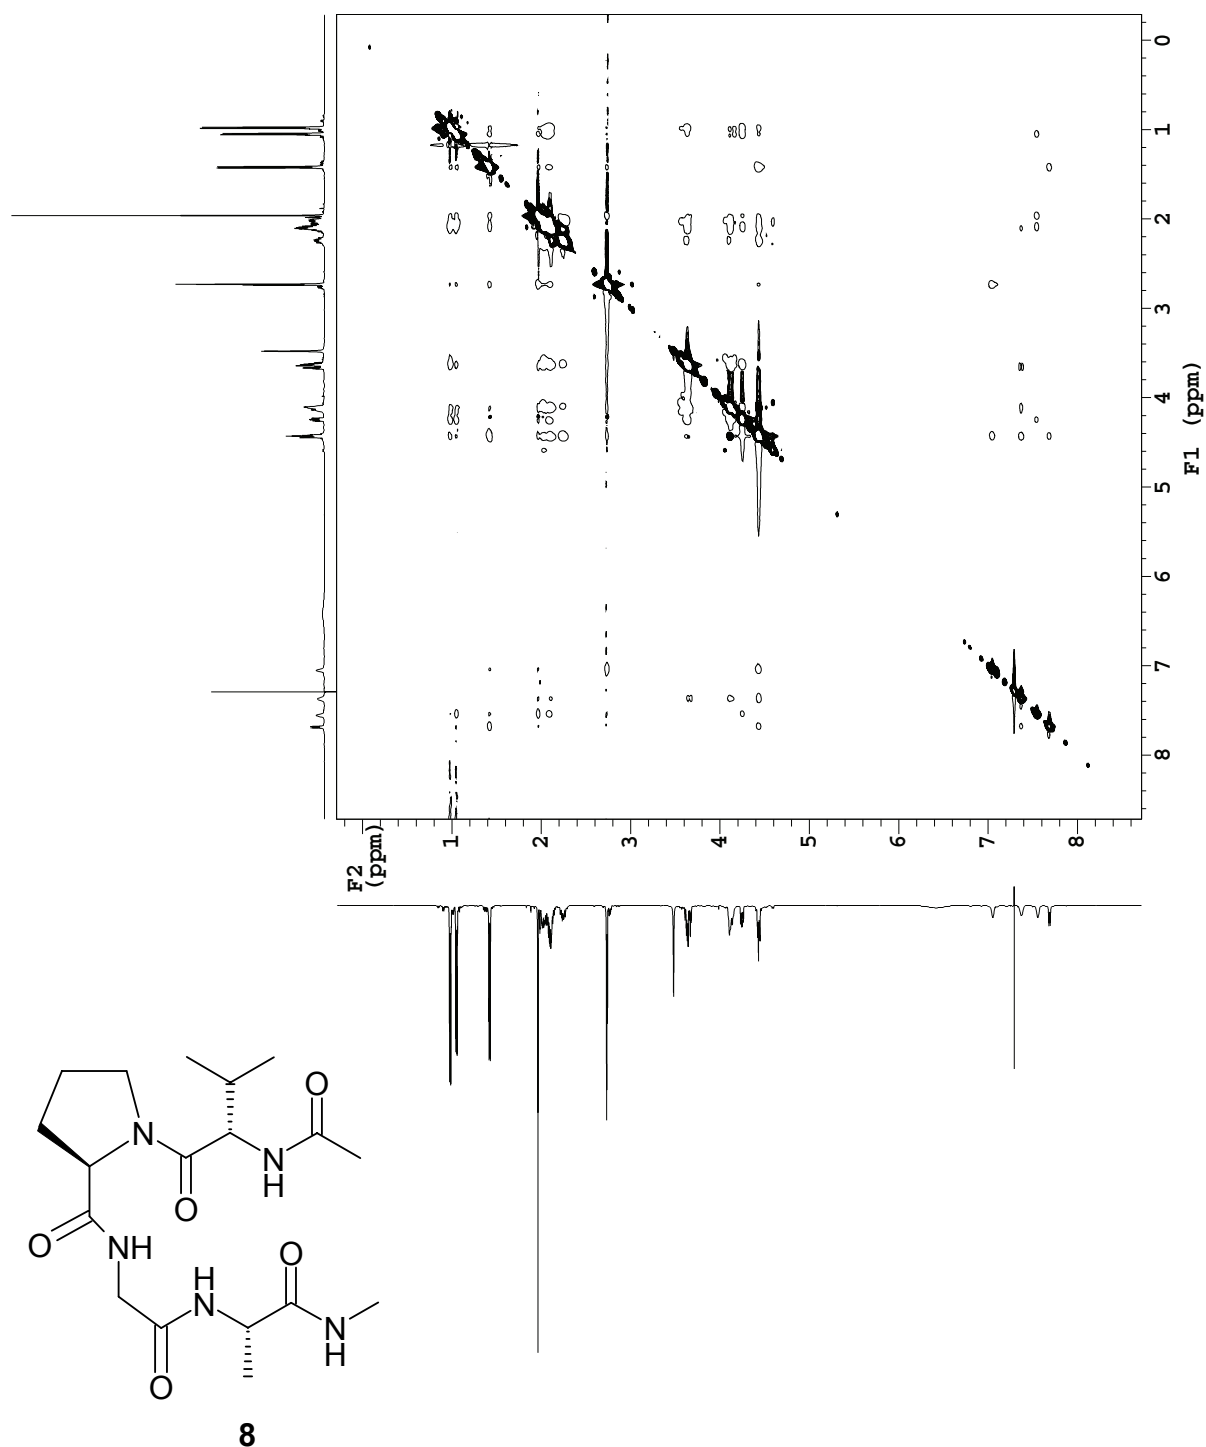Figure S 16: ROESY spectrum of compound **8** (499.9 MHz, CDCl<sub>3</sub> solution, 25°C).

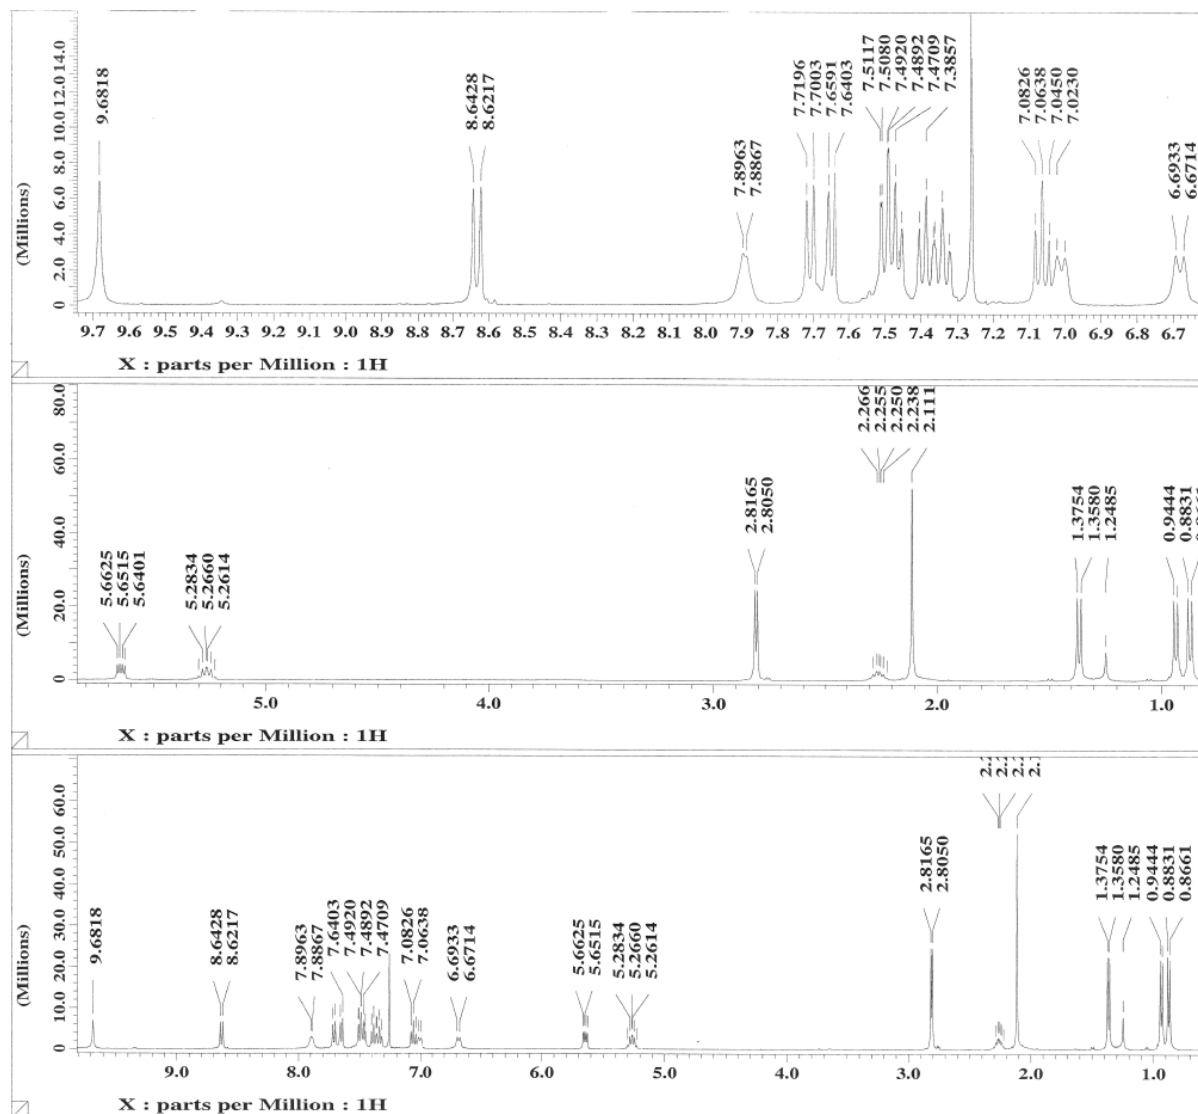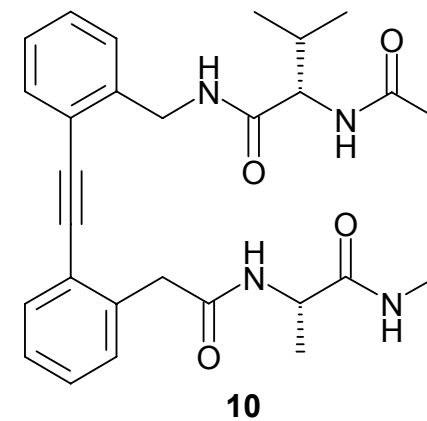Figure S 17:  $^1\text{H}$  NMR spectrum of compound **10** (399.8 MHz,  $\text{DMSO-d}_6$  solution,  $25^\circ\text{C}$ ).

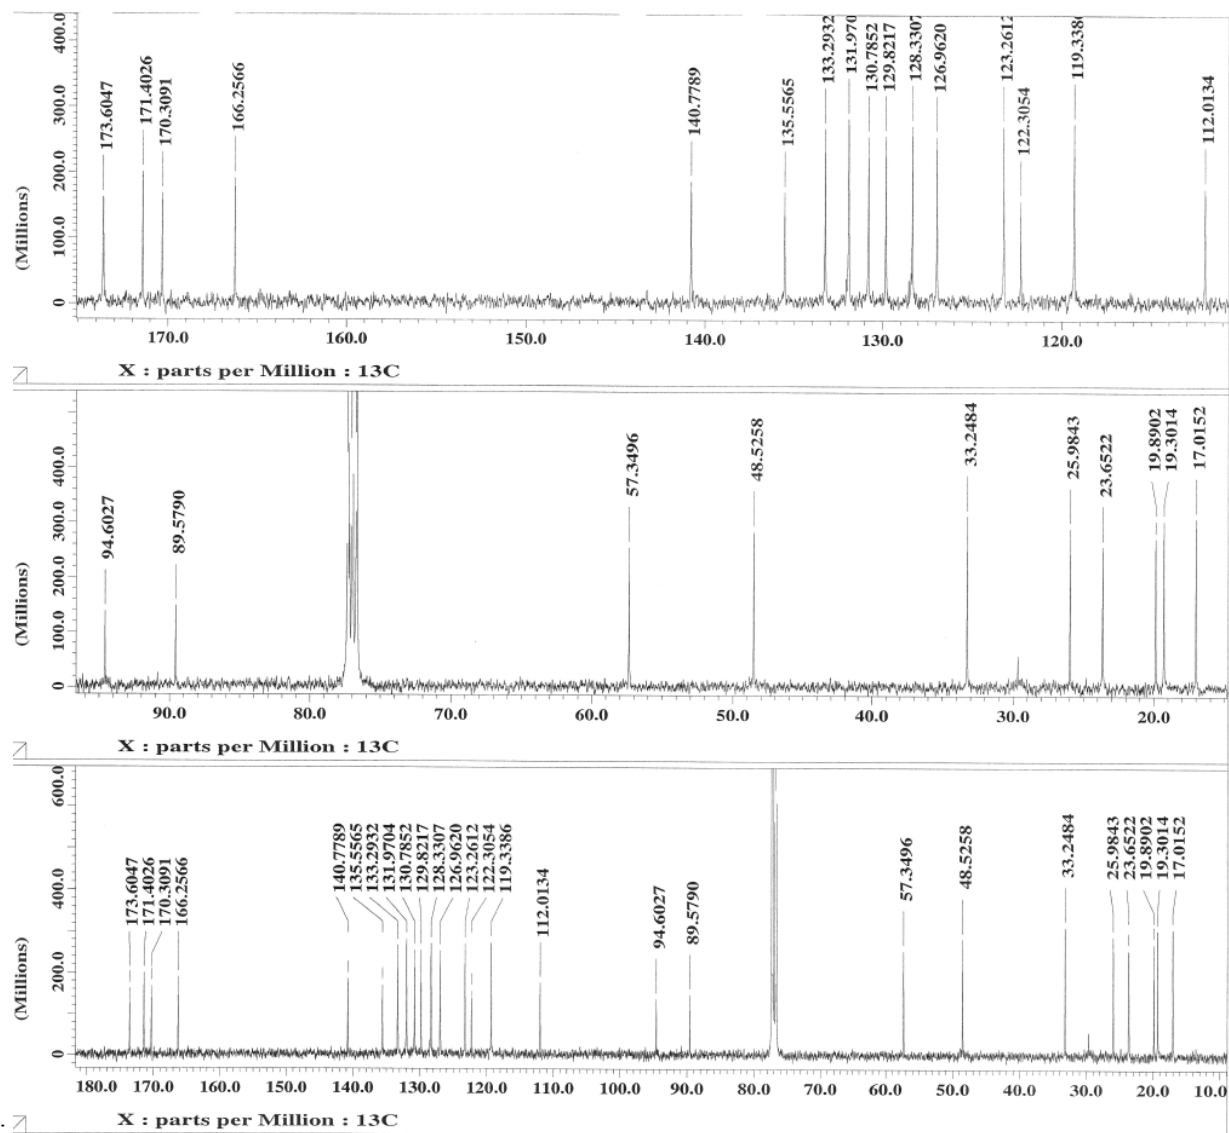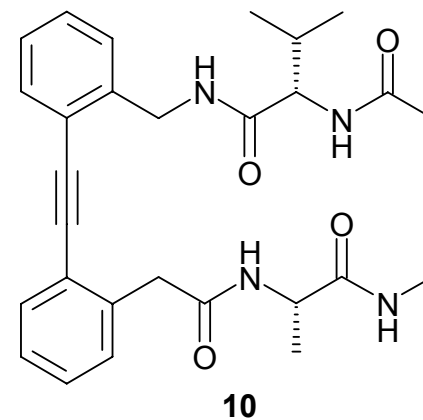Figure S 18:  $^{13}\text{C}$  NMR spectrum of compound **10** (75 MHz,  $\text{DMSO-d}_6$  solution,  $25^\circ\text{C}$ ).

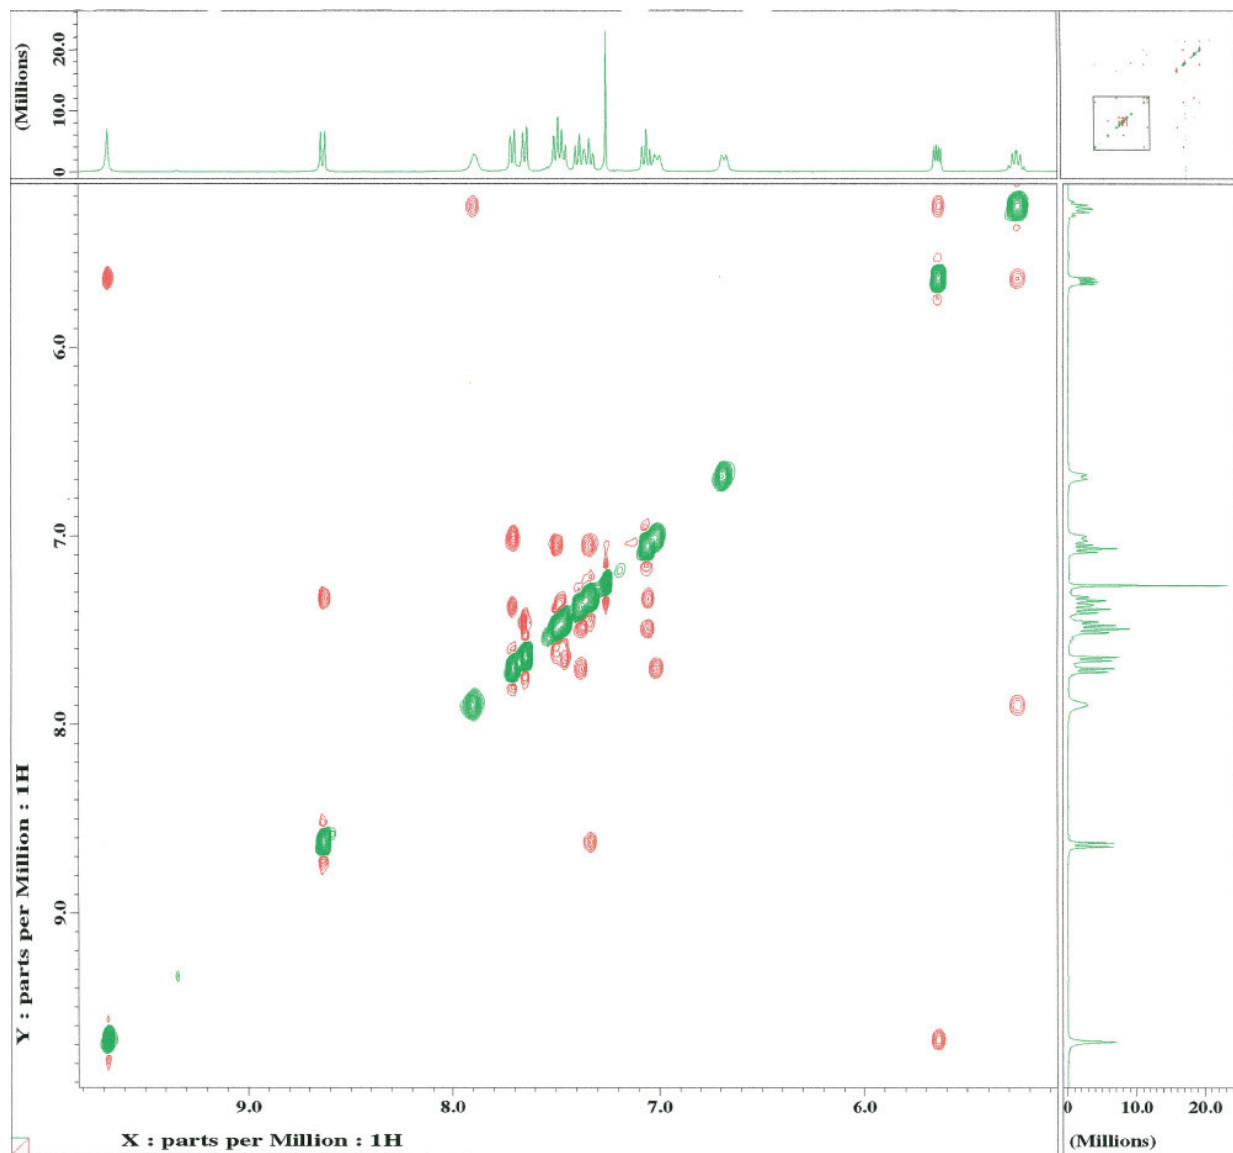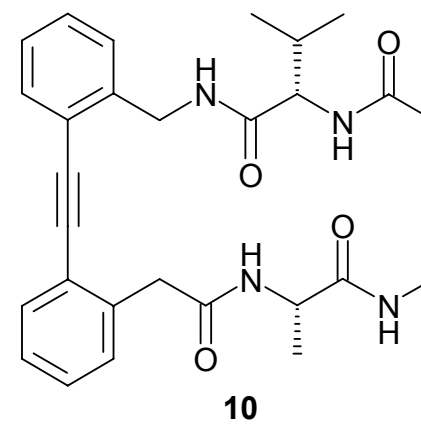Figure S 19: NOESY spectrum of compound **10** (399.8 MHz, DMSO-d<sub>6</sub> solution, 25°C).



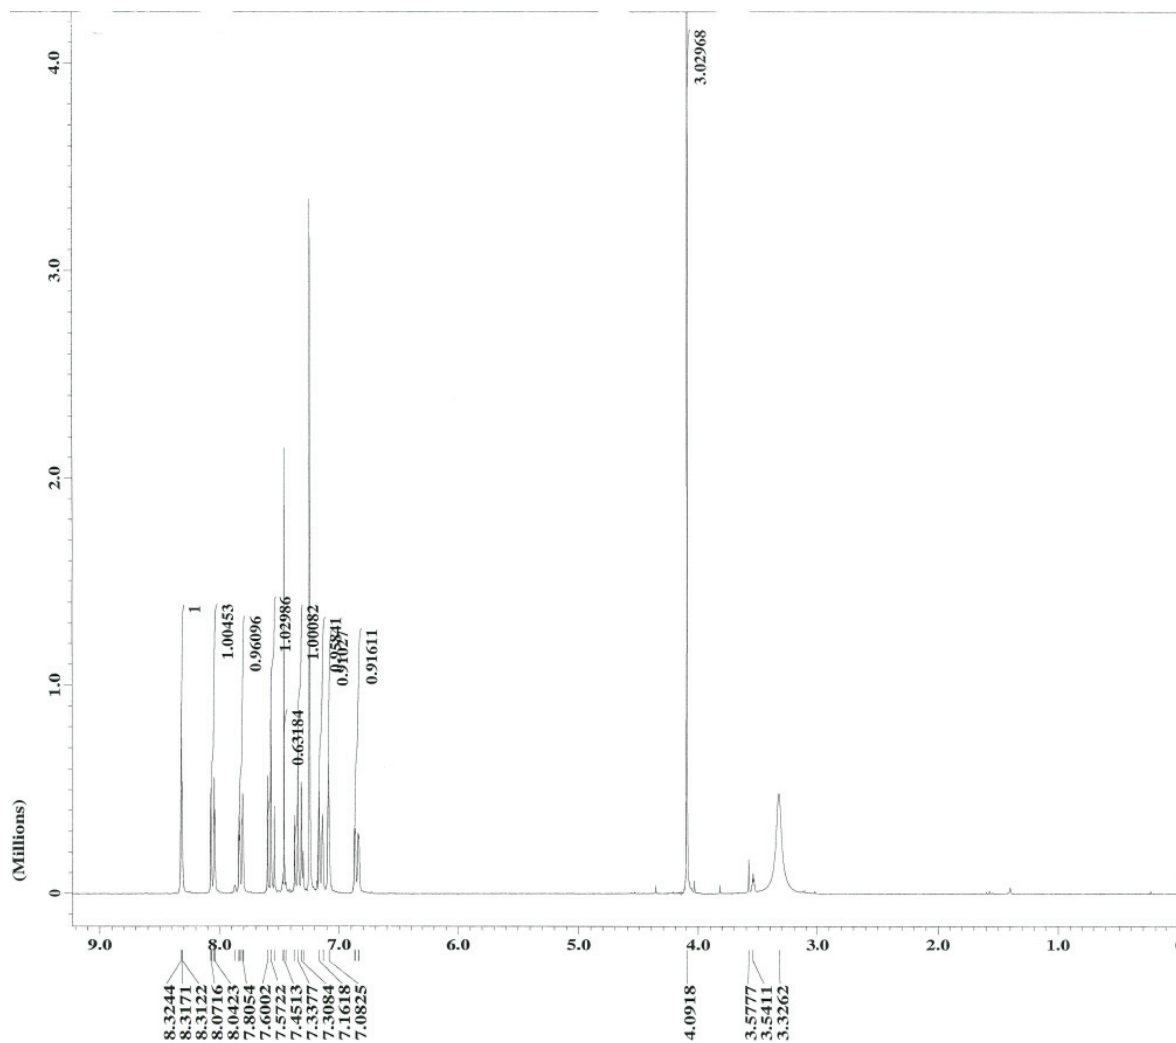Figure S 20:  $^1\text{H}$  NMR spectrum of compound **12** (270.2 MHz,  $\text{CDCl}_3$  solution, 25°C).

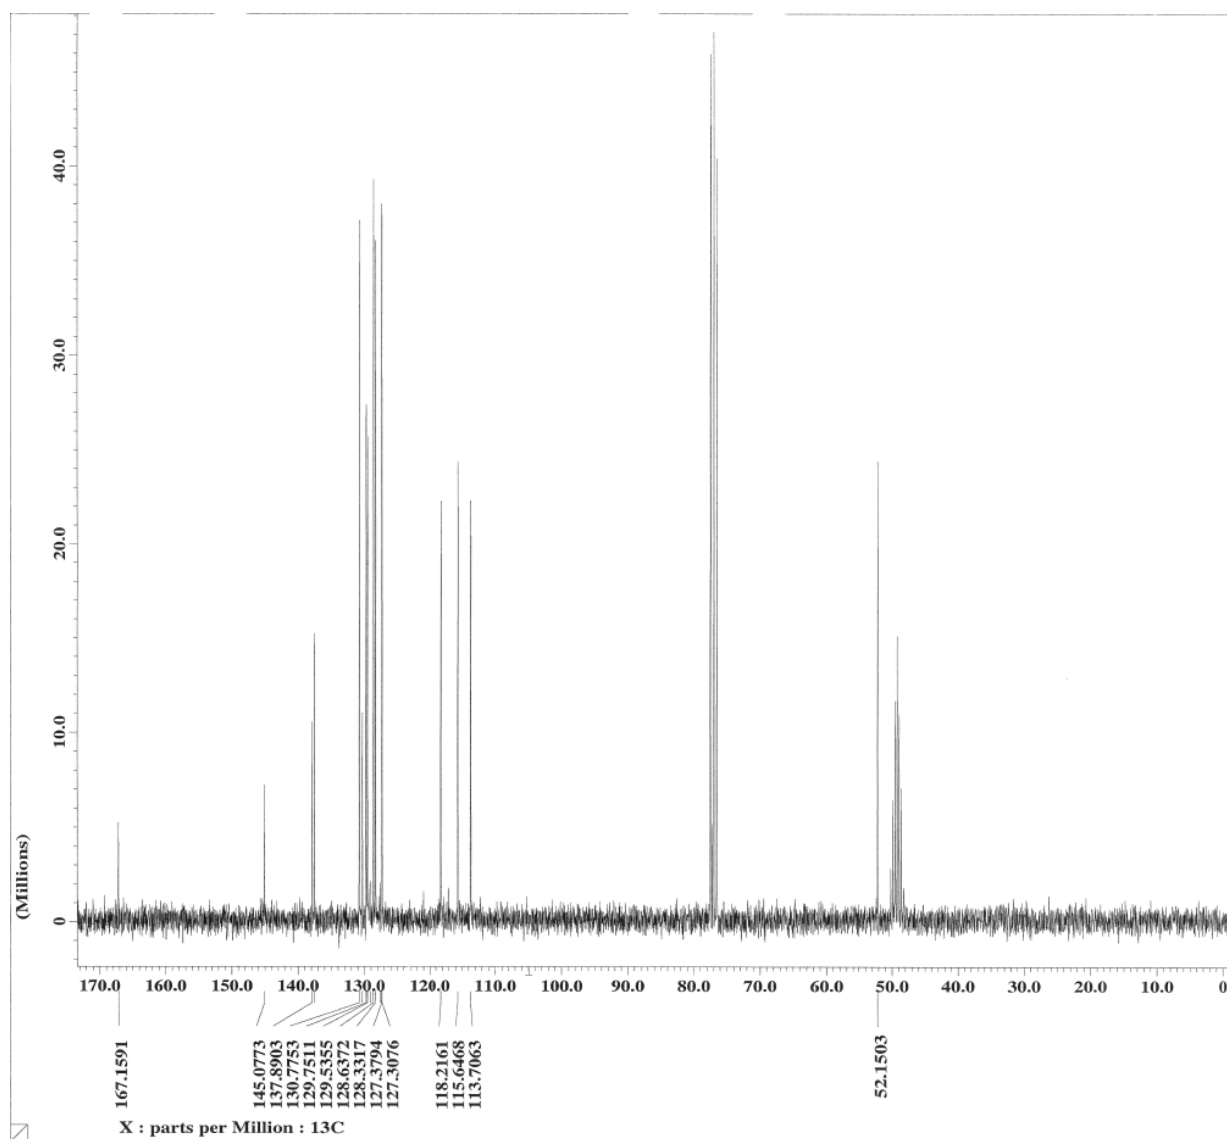Figure S 21: <sup>13</sup>C NMR spectrum of compound **12** (67.9 MHz, CDCl<sub>3</sub> solution, 25°C).

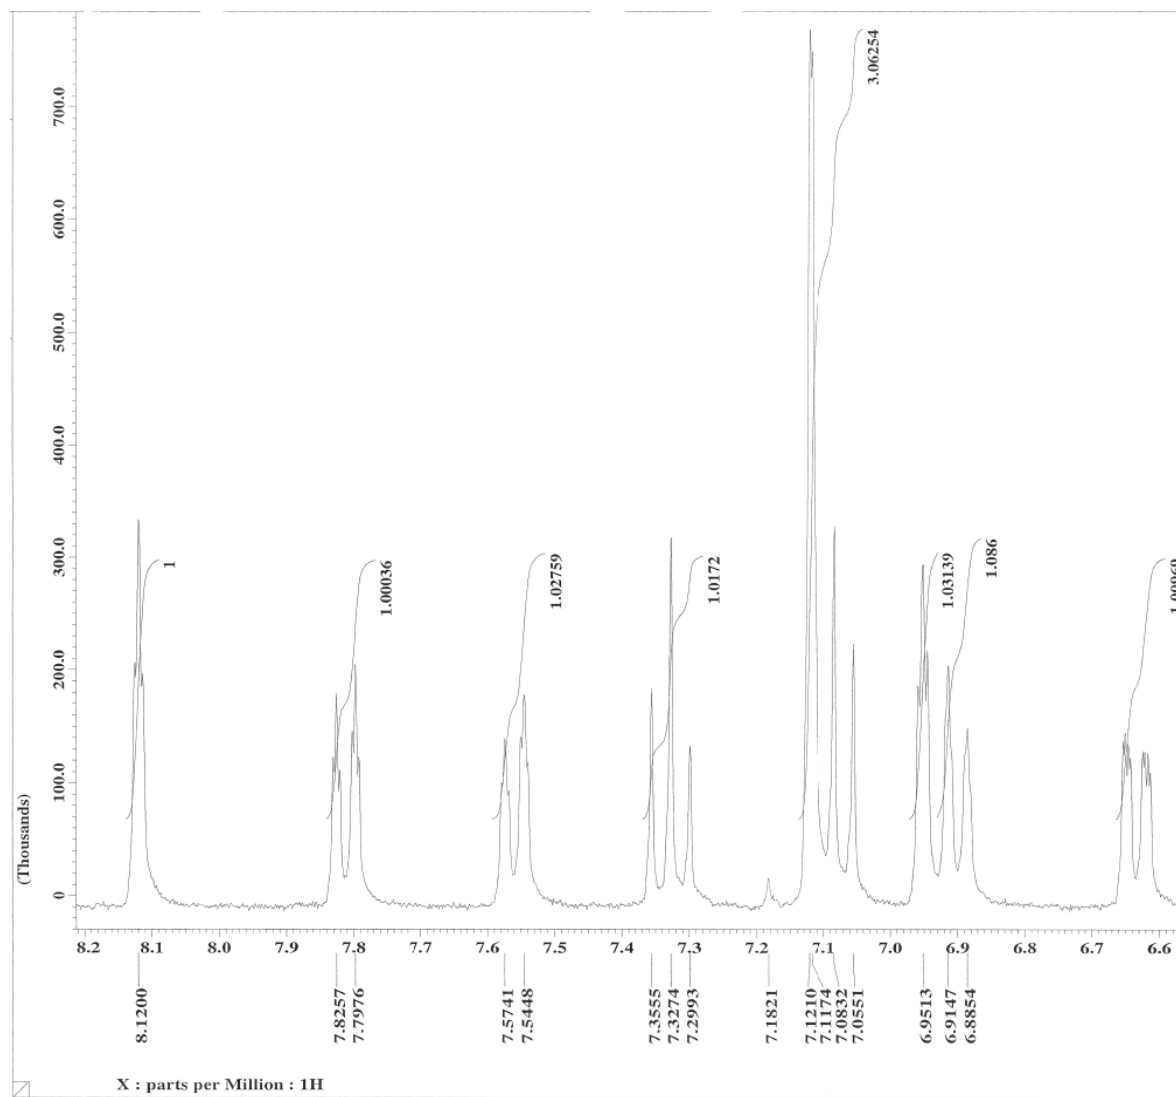Figure S 22:  $^1\text{H}$  NMR spectrum of compound **13** (399.9 MHz,  $\text{CD}_3\text{OD}$  solution,  $25^\circ\text{C}$ ).

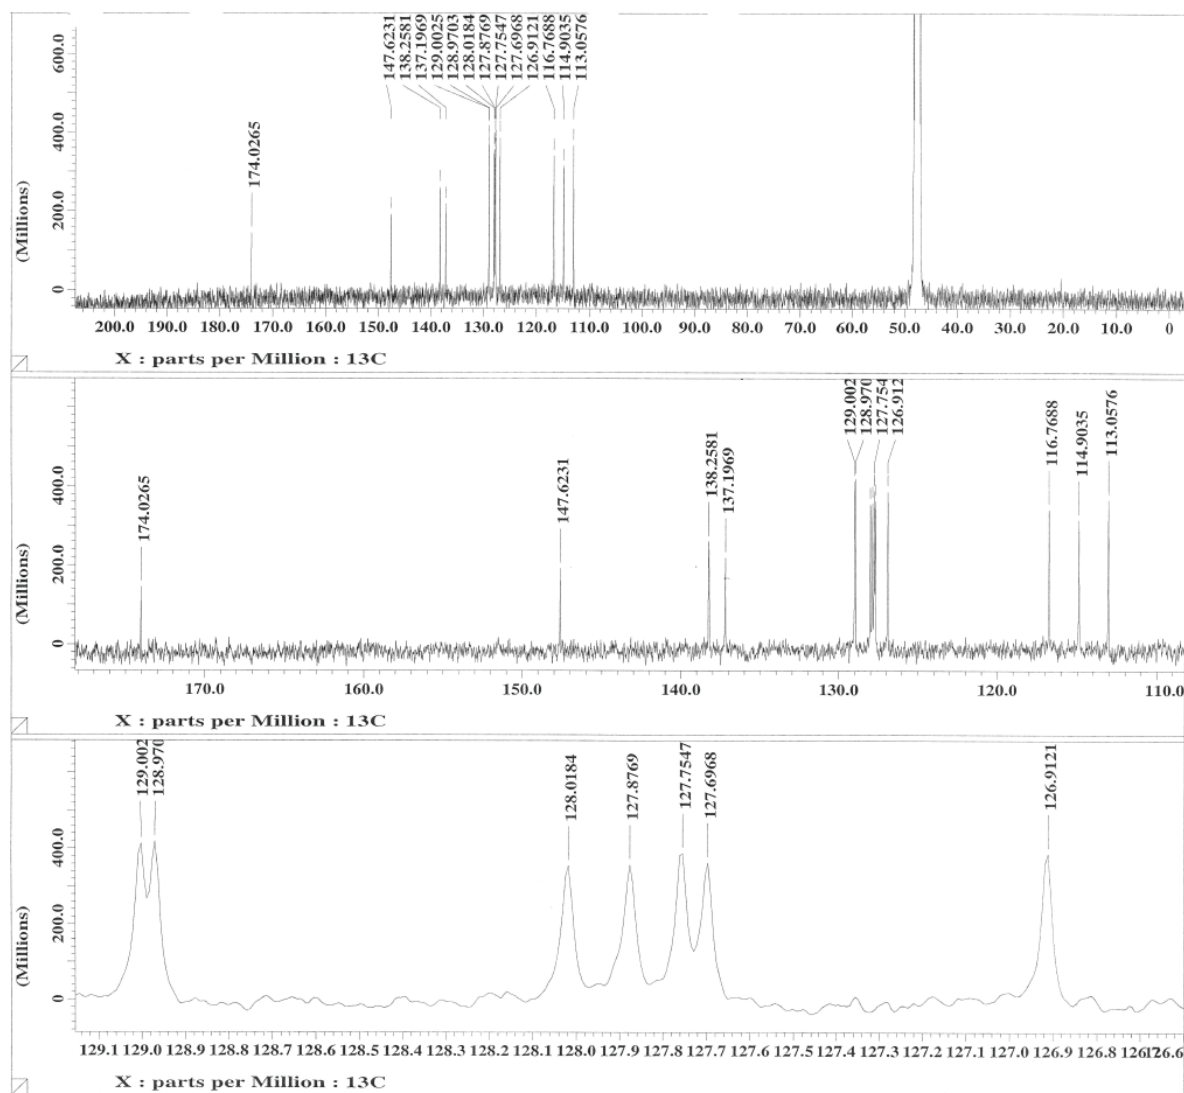Figure S 23:  $^{13}\text{C}$  NMR spectrum of compound **13** (100.5 MHz,  $\text{CD}_3\text{OD}$  solution, 25°C).

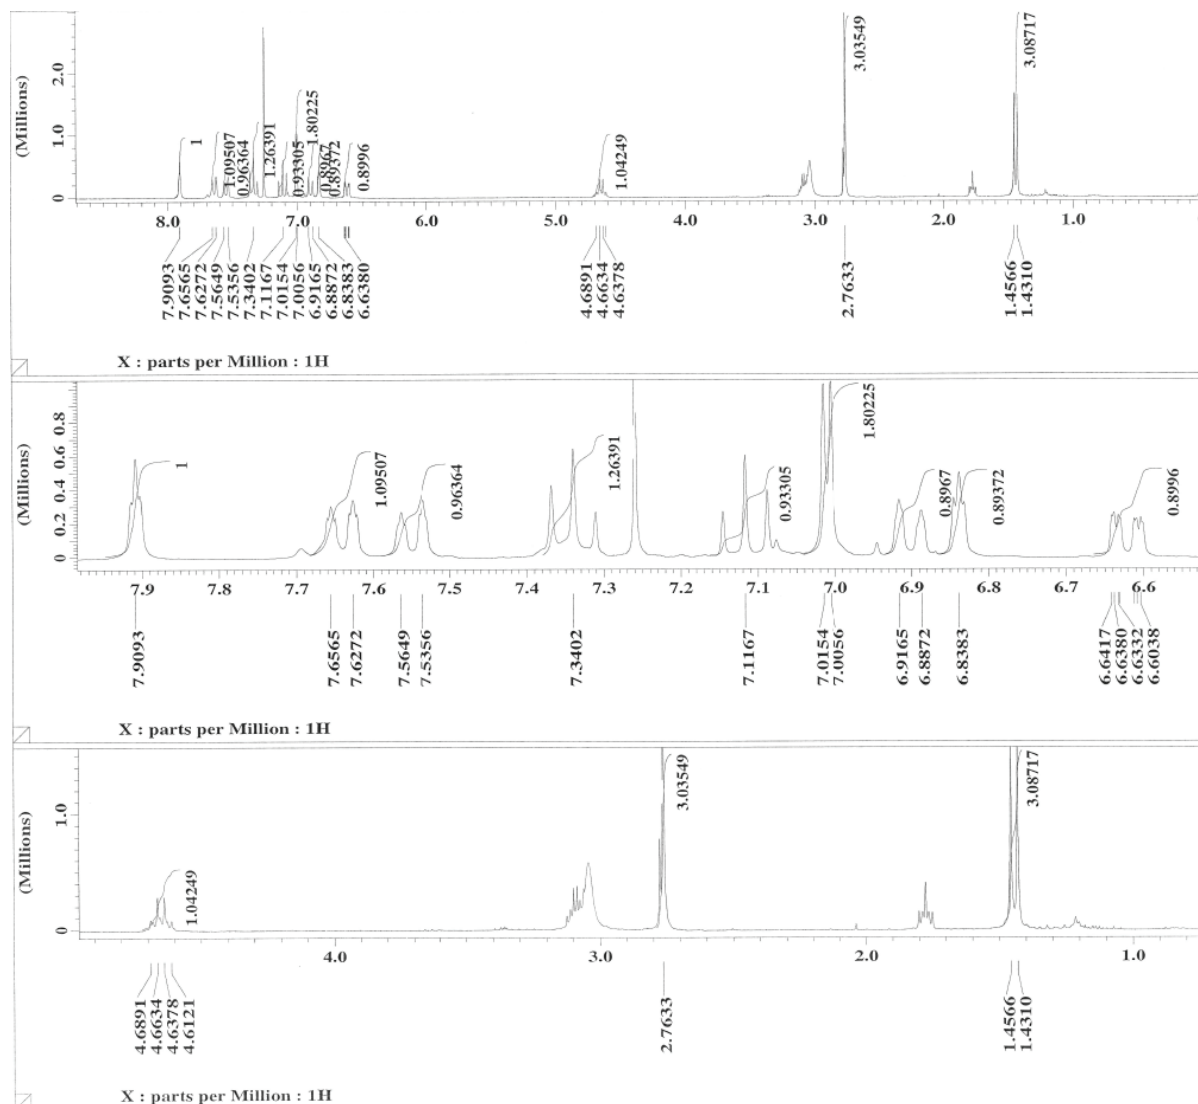Figure S 24:  $^1\text{H}$  NMR spectrum of compound **14** (270.2 MHz,  $\text{CDCl}_3$  solution,  $25^\circ\text{C}$ ).

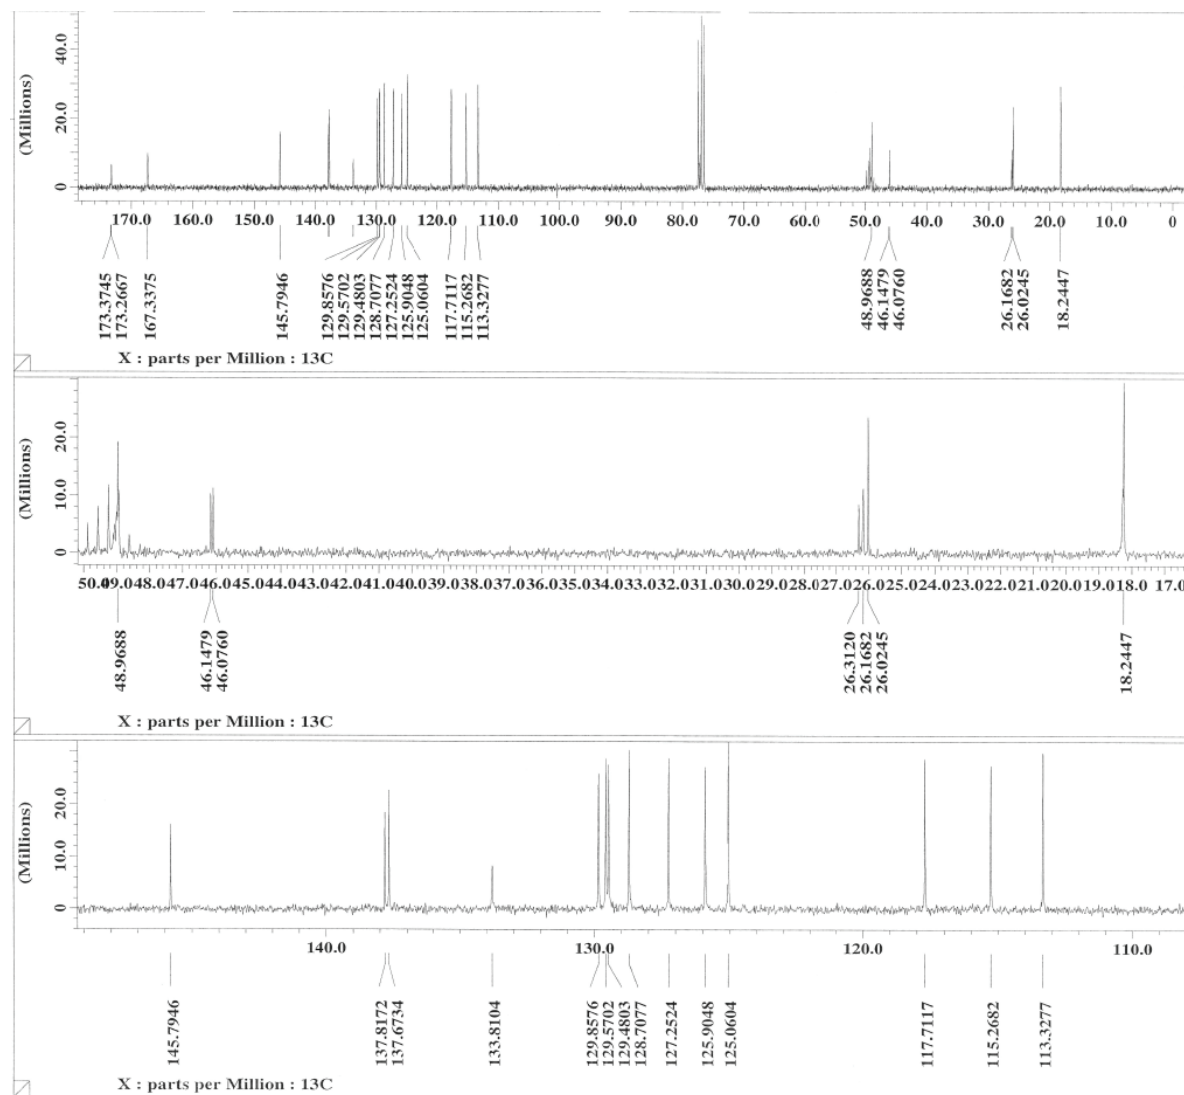Figure S 25:  $^{13}\text{C}$  NMR spectrum of compound **14** (67.9 MHz,  $\text{CDCl}_3$  solution,  $25^\circ\text{C}$ ).

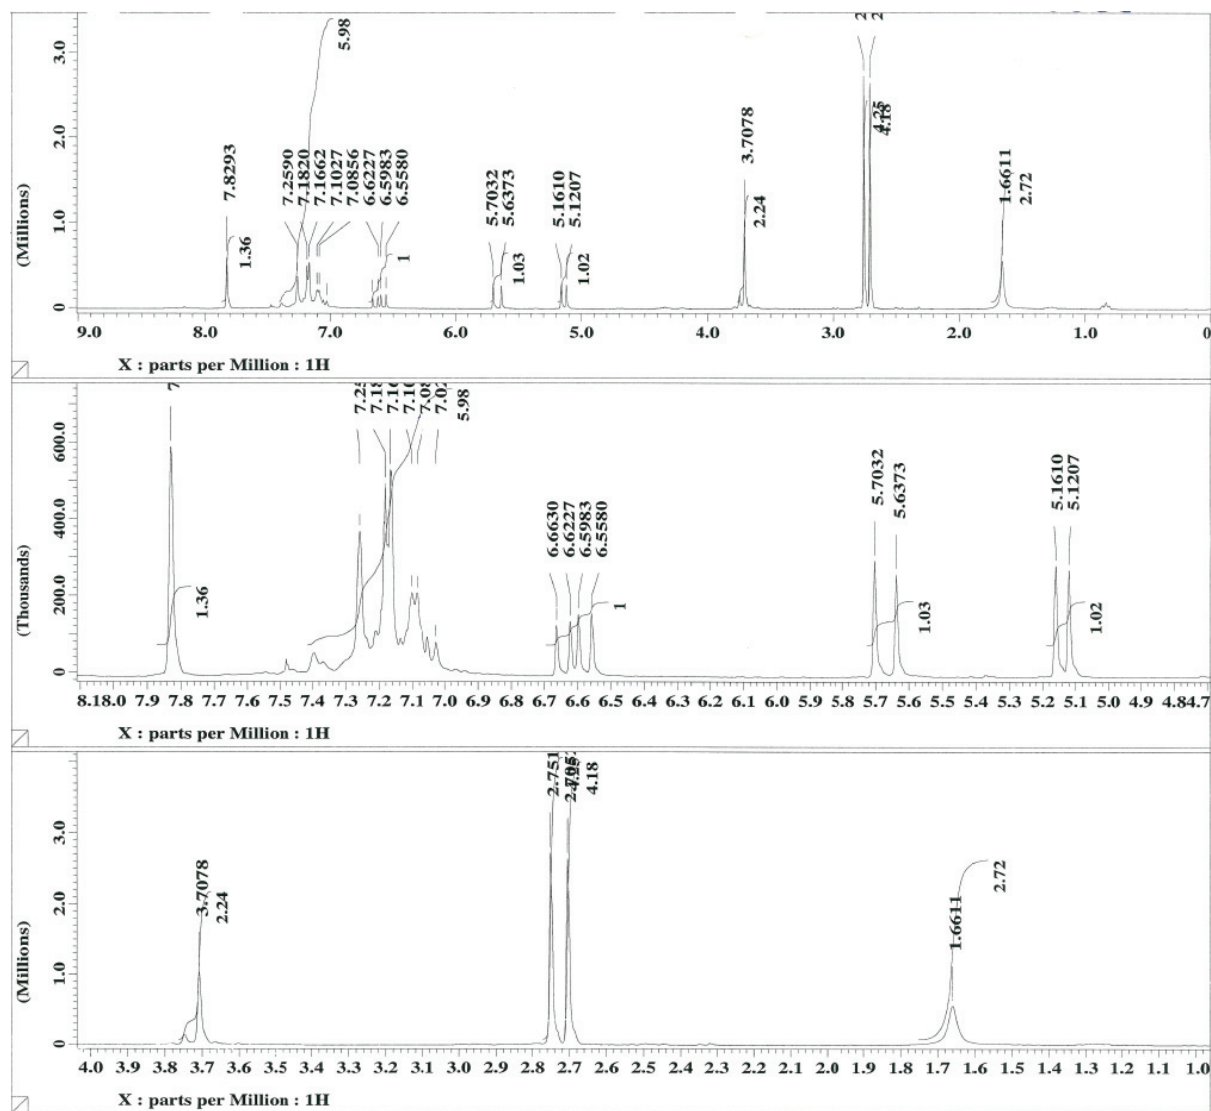Figure S 26:  $^1\text{H}$  NMR spectrum of compound **16** (270.2 MHz,  $\text{CDCl}_3$  solution, 25°C).

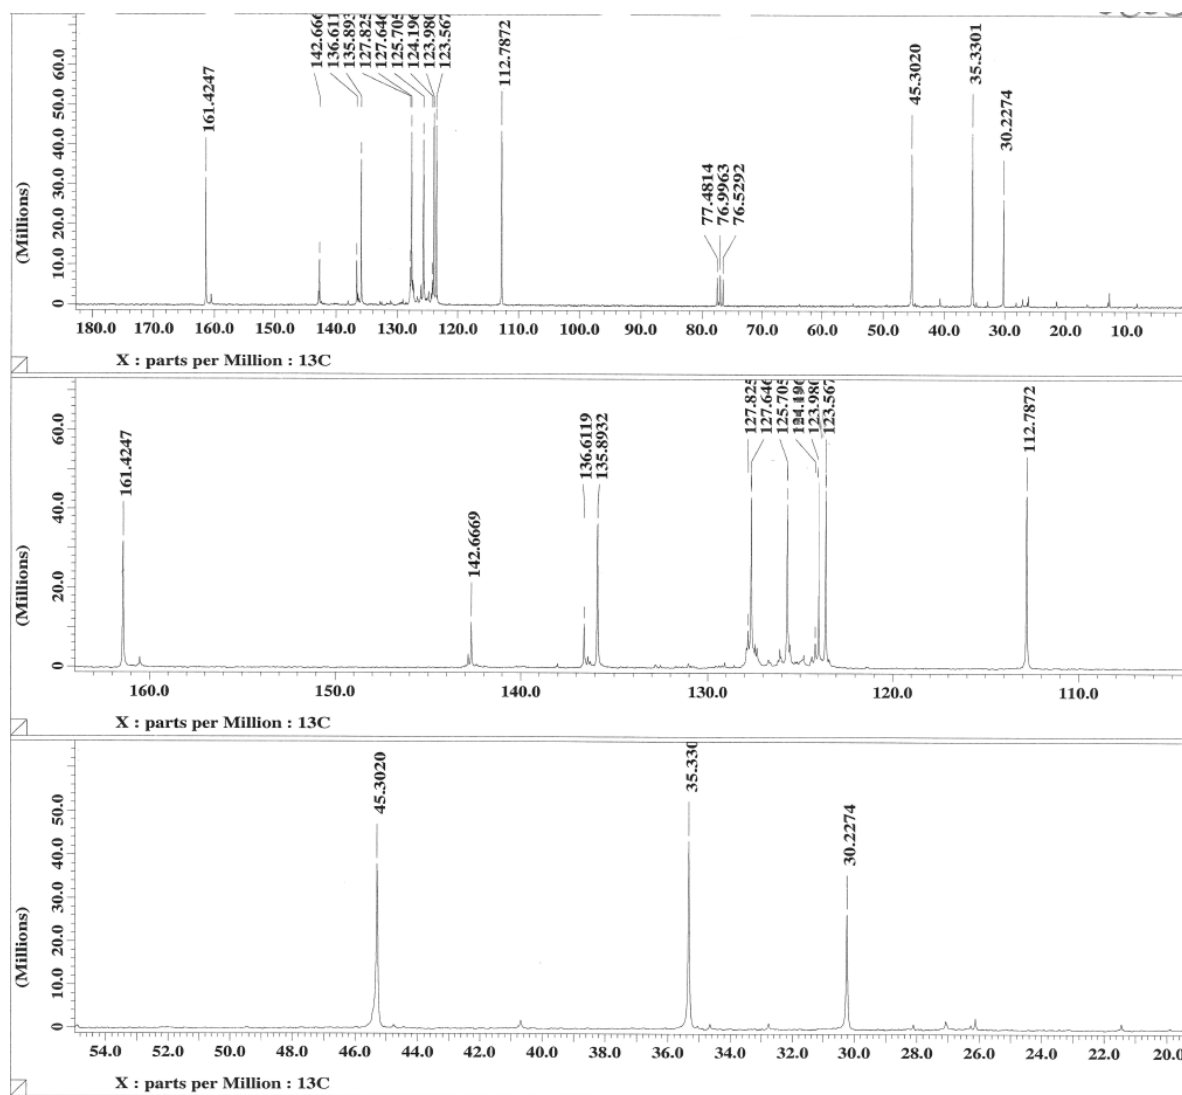Figure S 27:  $^{13}\text{C}$  NMR spectrum of compound **16** (67.9 MHz,  $\text{CDCl}_3$  solution,  $25^\circ\text{C}$ ).



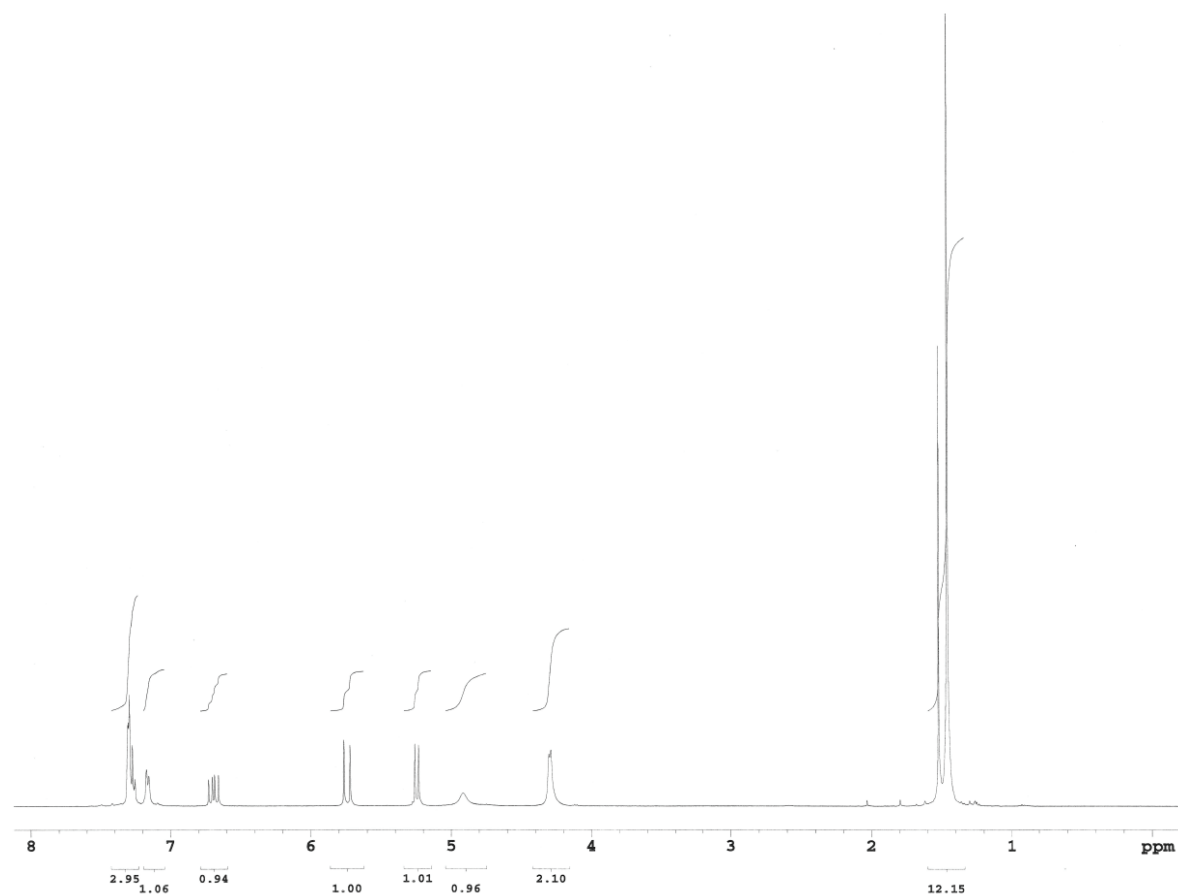

Figure S 28:  $^1\text{H}$  NMR spectrum of compound **17** (399.9 MHz,  $\text{CDCl}_3$  solution, 25°C).

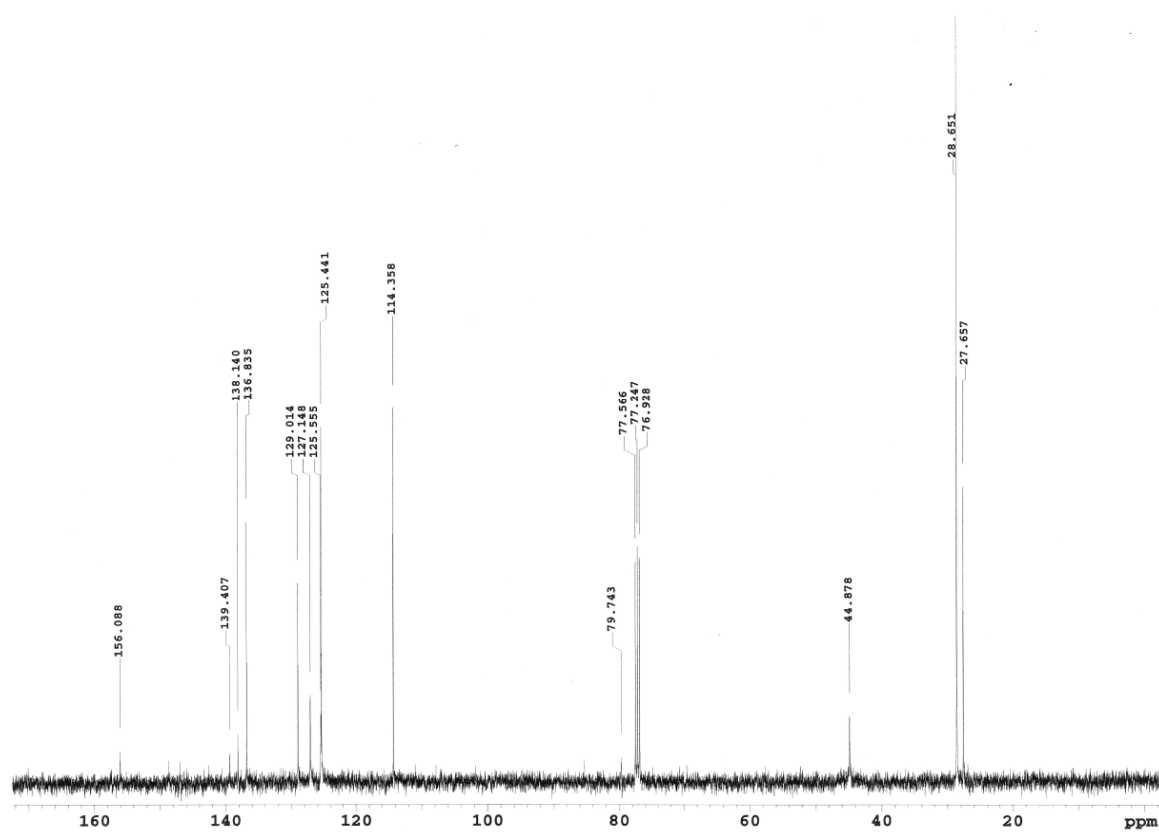

Figure S 29:  $^{13}\text{C}$  NMR spectrum of compound **17** (100.6 MHz,  $\text{CDCl}_3$  solution,  $25^\circ\text{C}$ ).

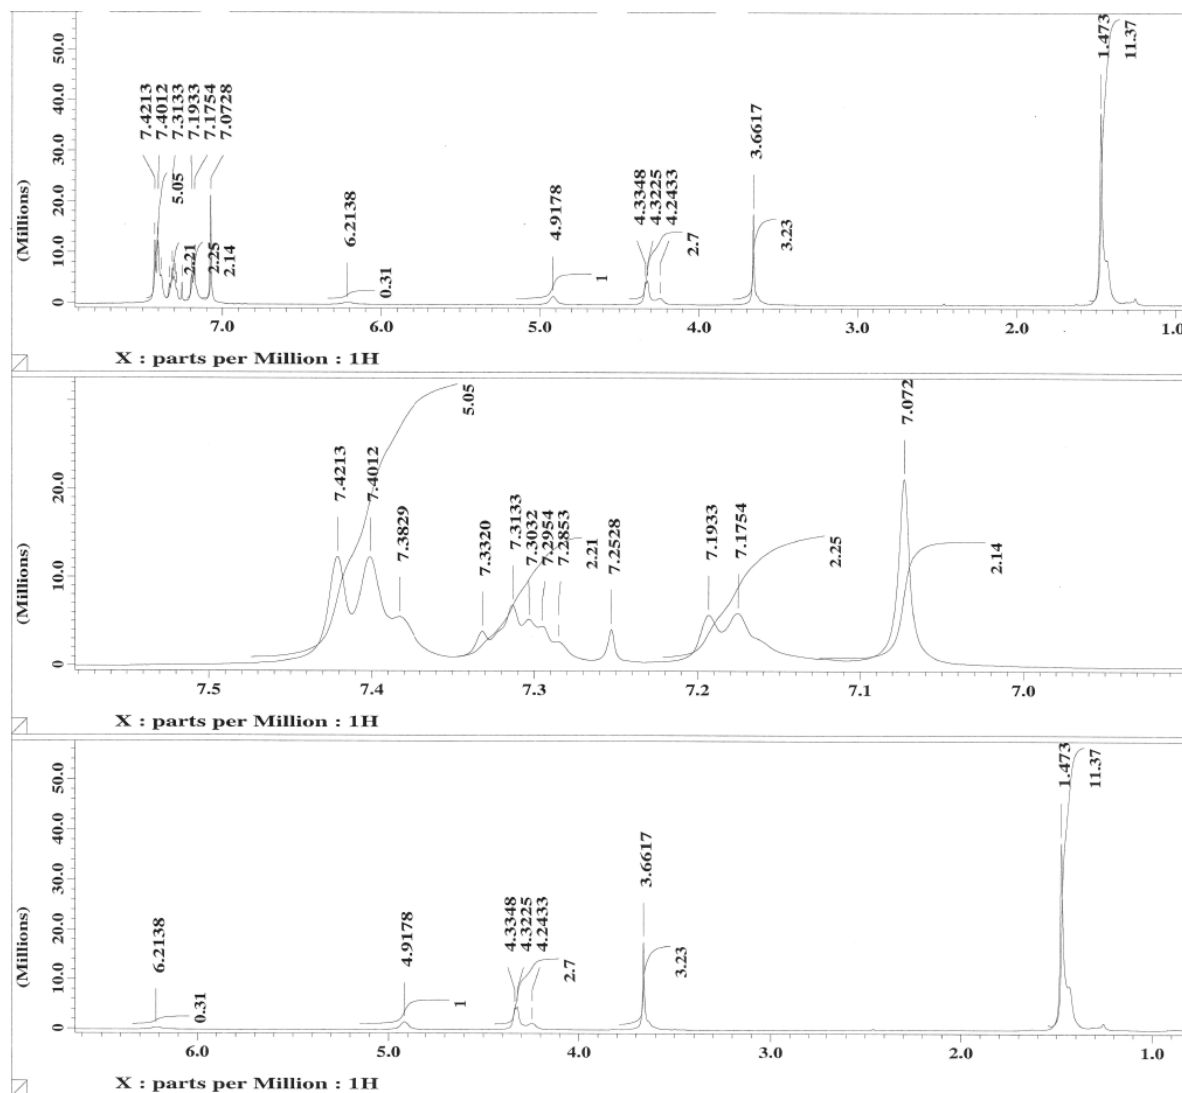Figure S 30:  $^1\text{H}$  NMR spectrum of compound **19** (399.8 MHz,  $\text{CDCl}_3$  solution, 25°C).

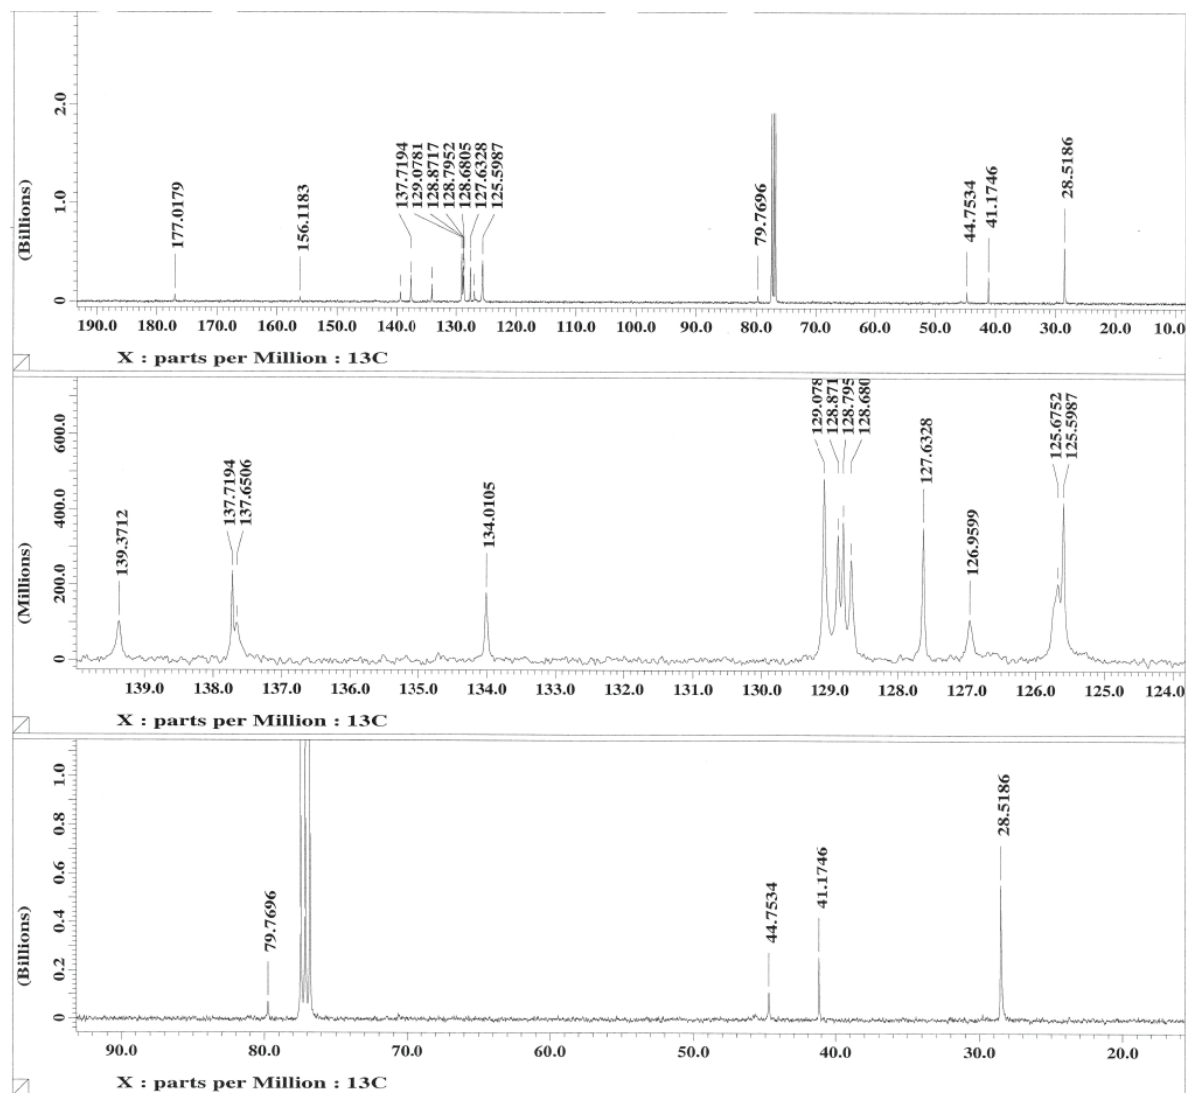Figure S 31:  $^{13}\text{C}$  NMR spectrum of compound **19** (100.5 MHz,  $\text{CDCl}_3$  solution,  $25^\circ\text{C}$ ).

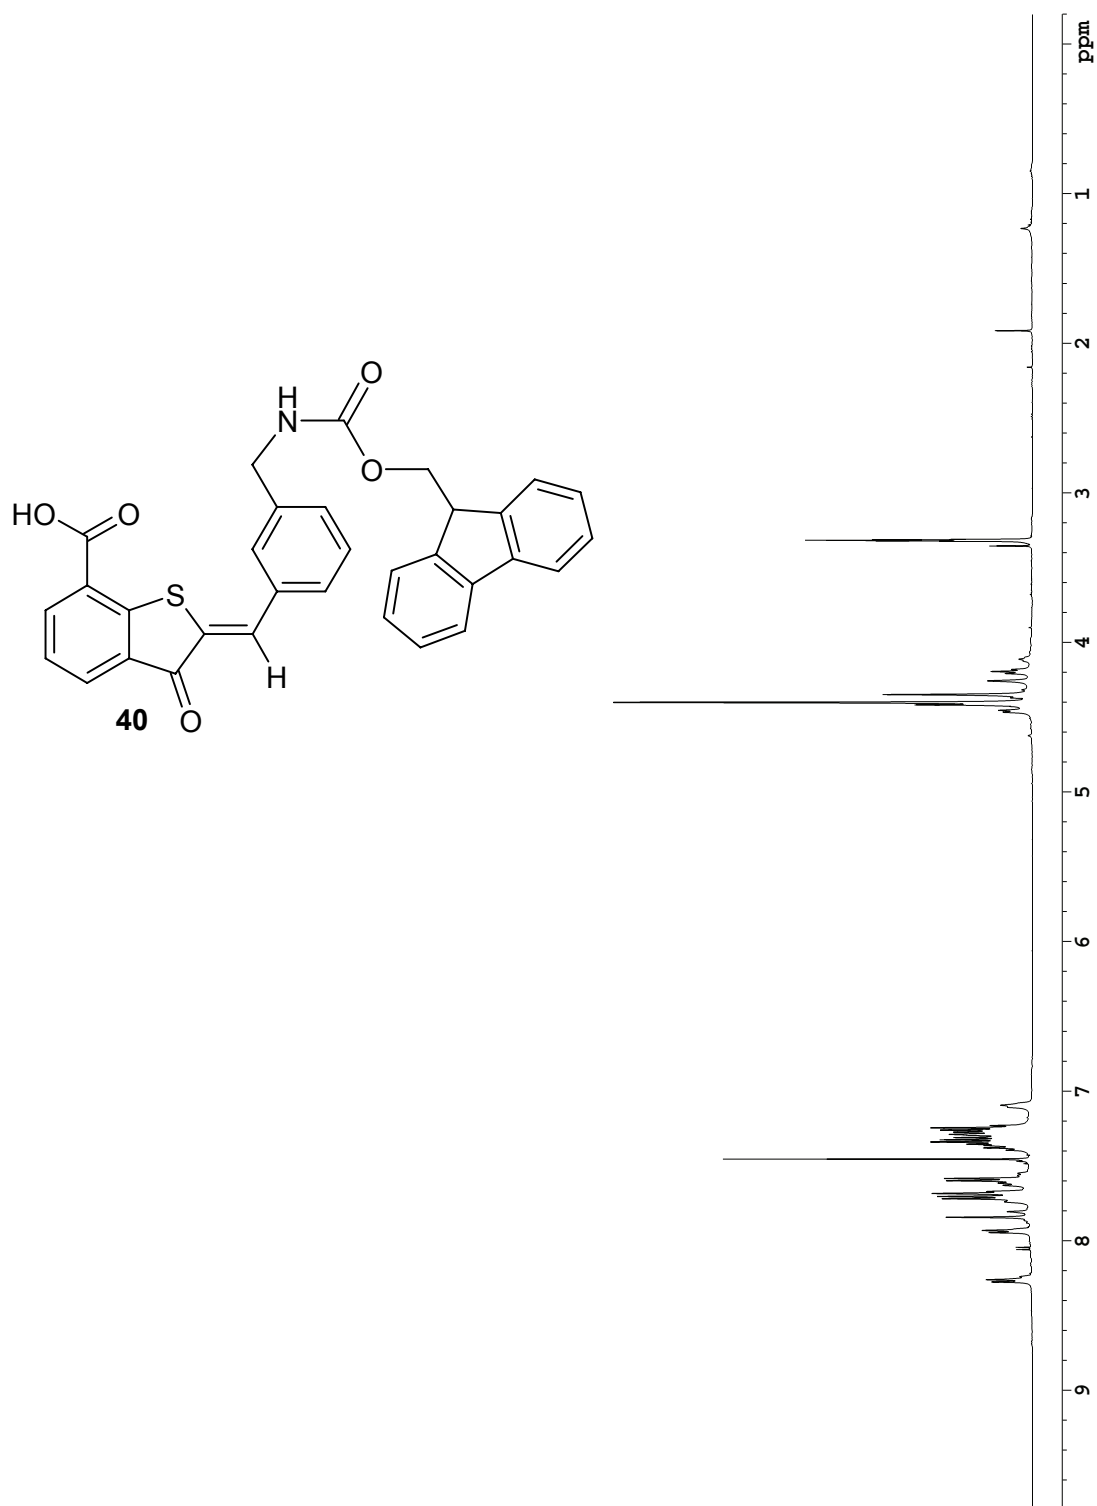Figure S 32: <sup>1</sup>H NMR spectrum of compound **40** (499.9 MHz, CD<sub>3</sub>OD/CDCl<sub>3</sub> (3:1) solution, 25°C).

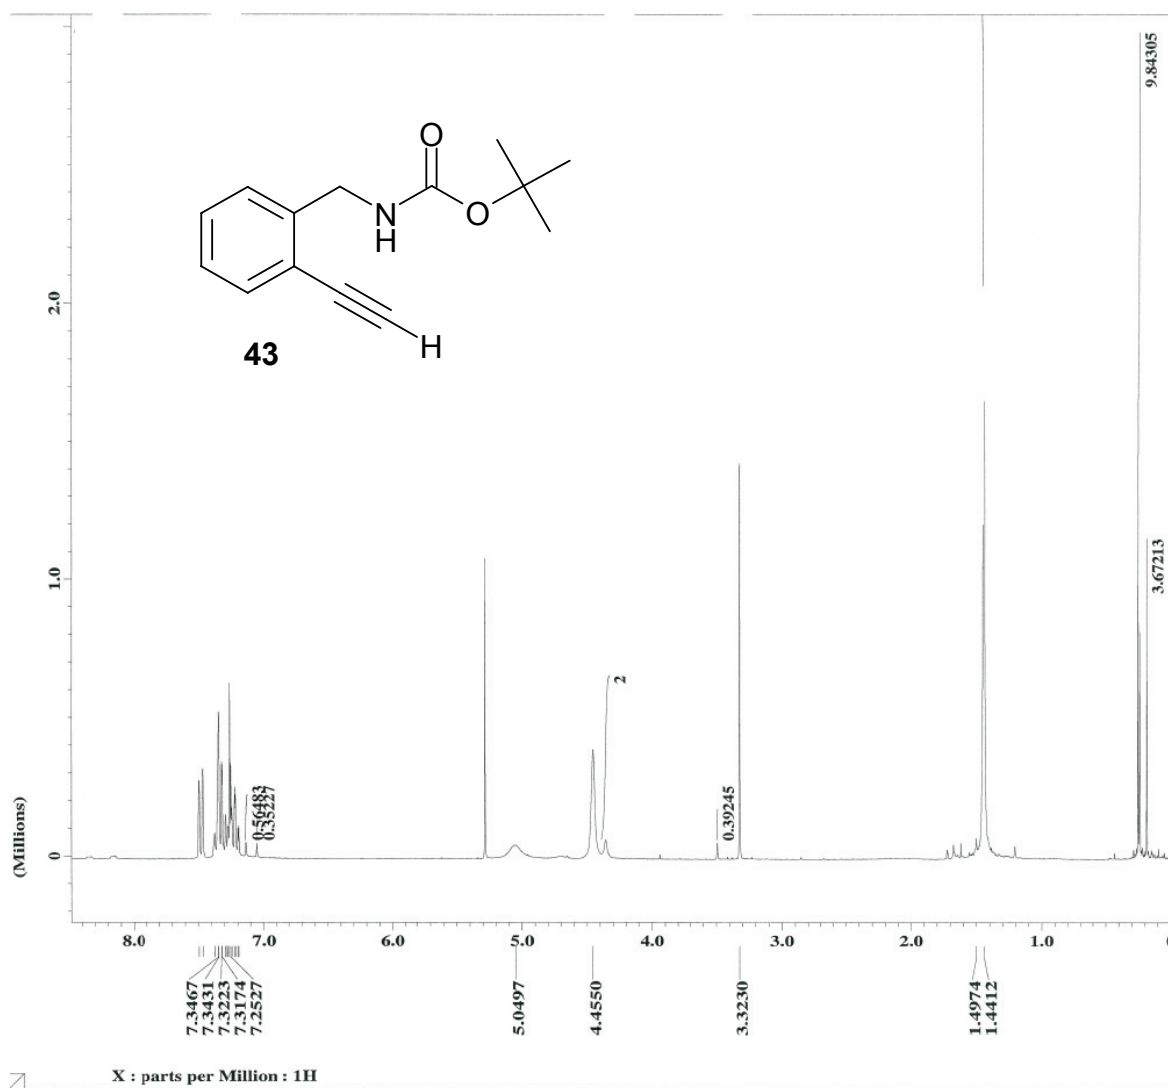Figure S 33:  $^1\text{H}$  NMR spectrum of compound **43** (270.2 MHz,  $\text{CDCl}_3$  solution, 25°C).

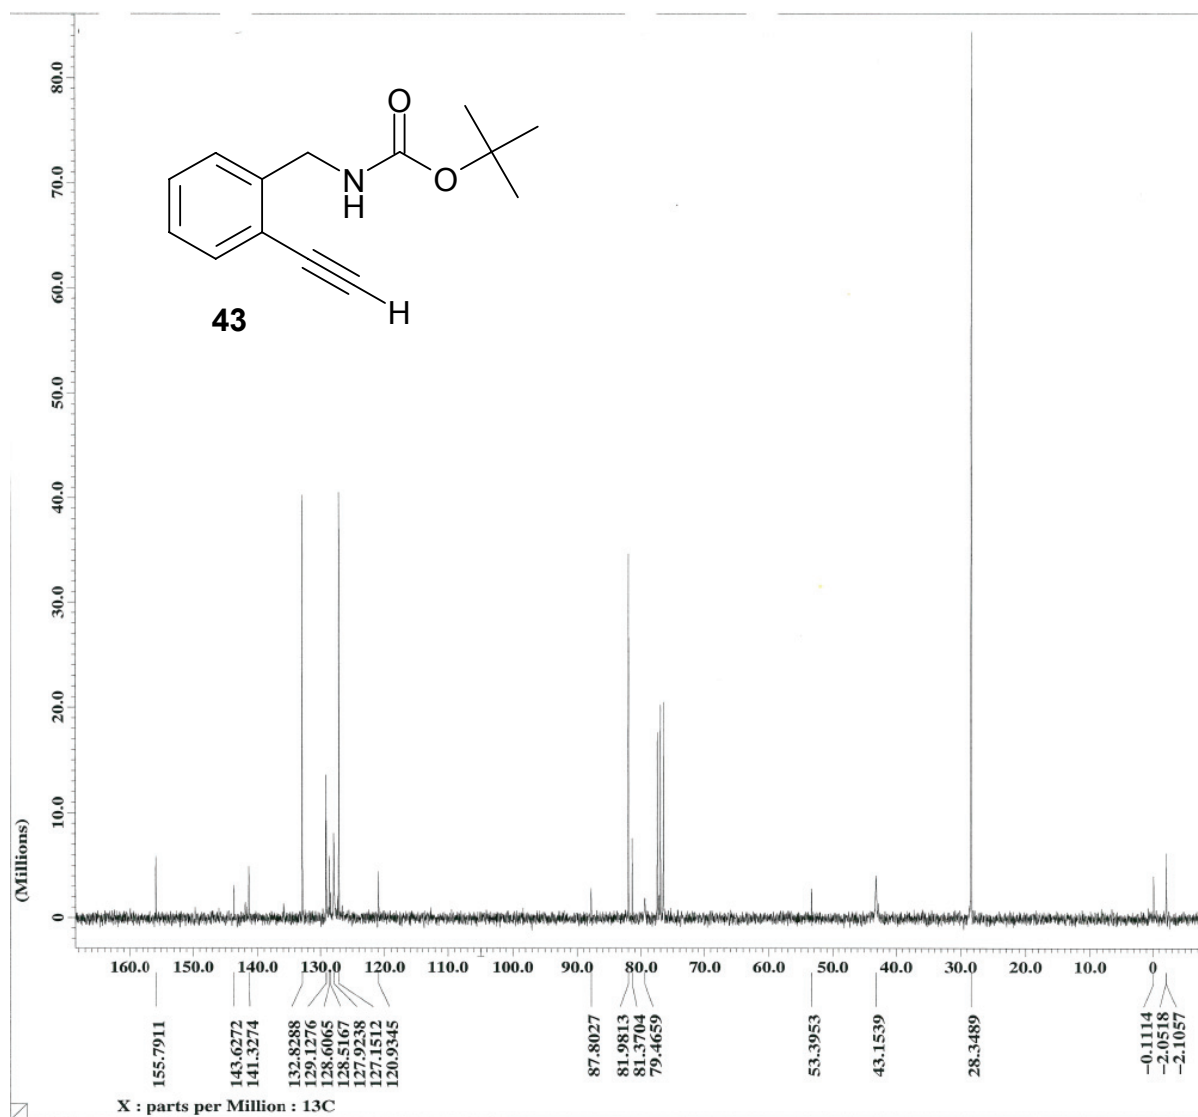Figure S 34: <sup>13</sup>C NMR spectrum of compound **43** (67.9 MHz, CDCl<sub>3</sub> solution, 25°C).

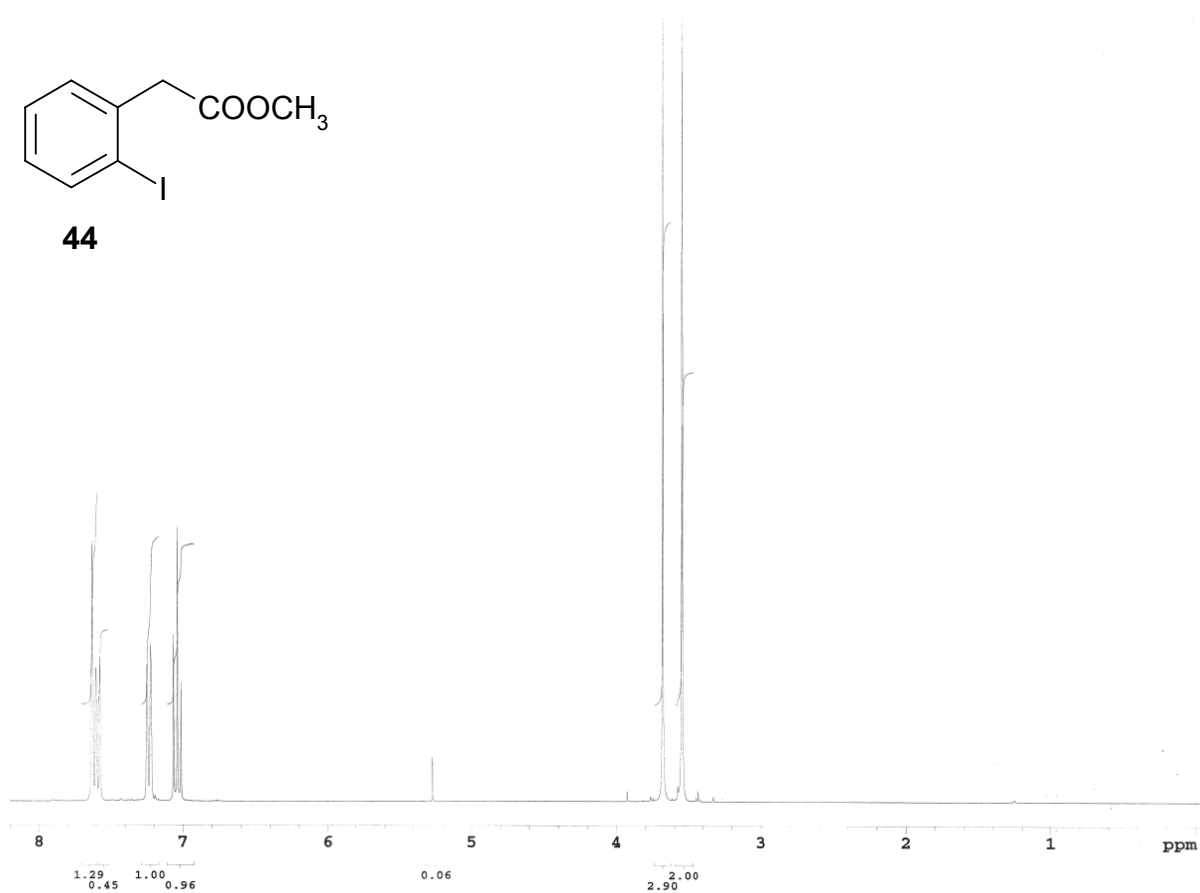Figure S 35: <sup>1</sup>H NMR spectrum of compound **44** (300 MHz, CDCl<sub>3</sub> solution, 25°C).



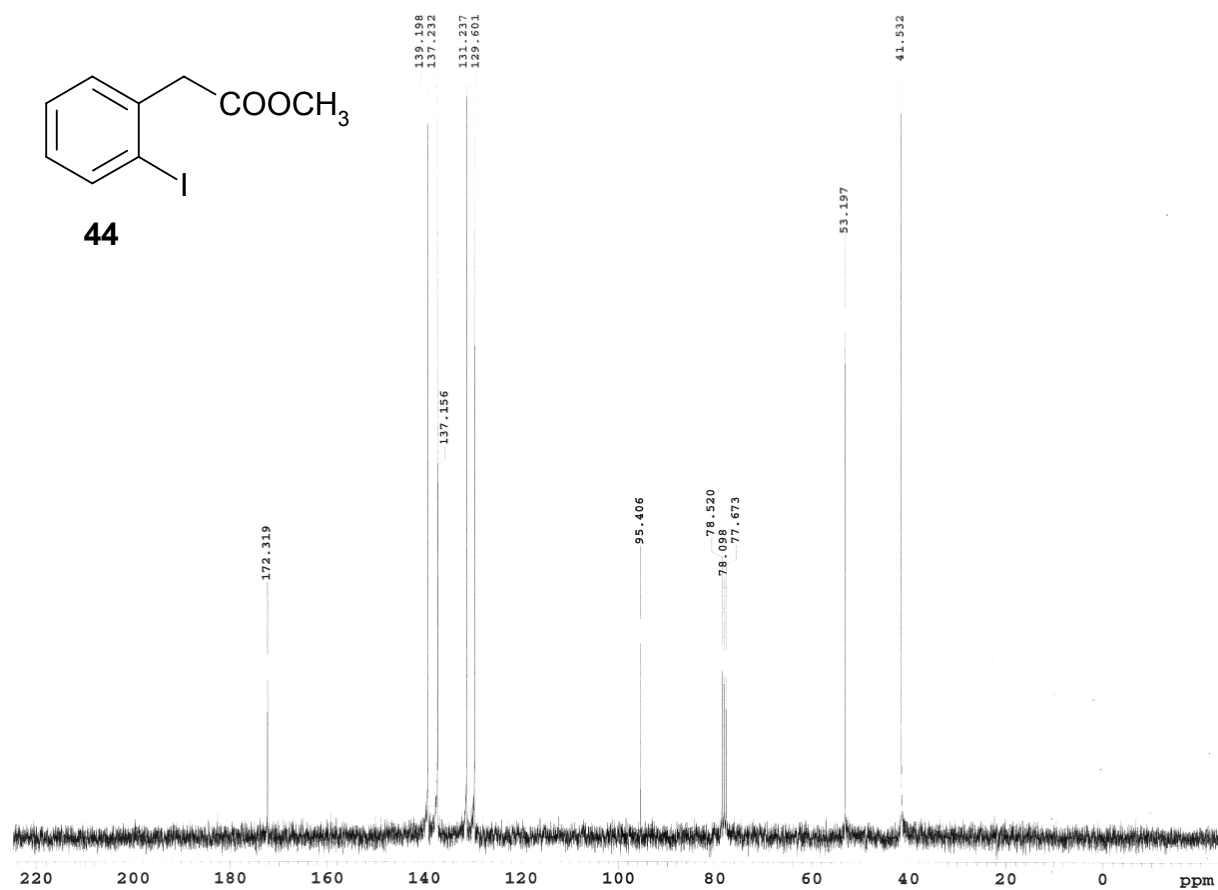Figure S 36: <sup>13</sup>C NMR spectrum of compound **44** (75 MHz, CDCl<sub>3</sub> solution, 25°C).

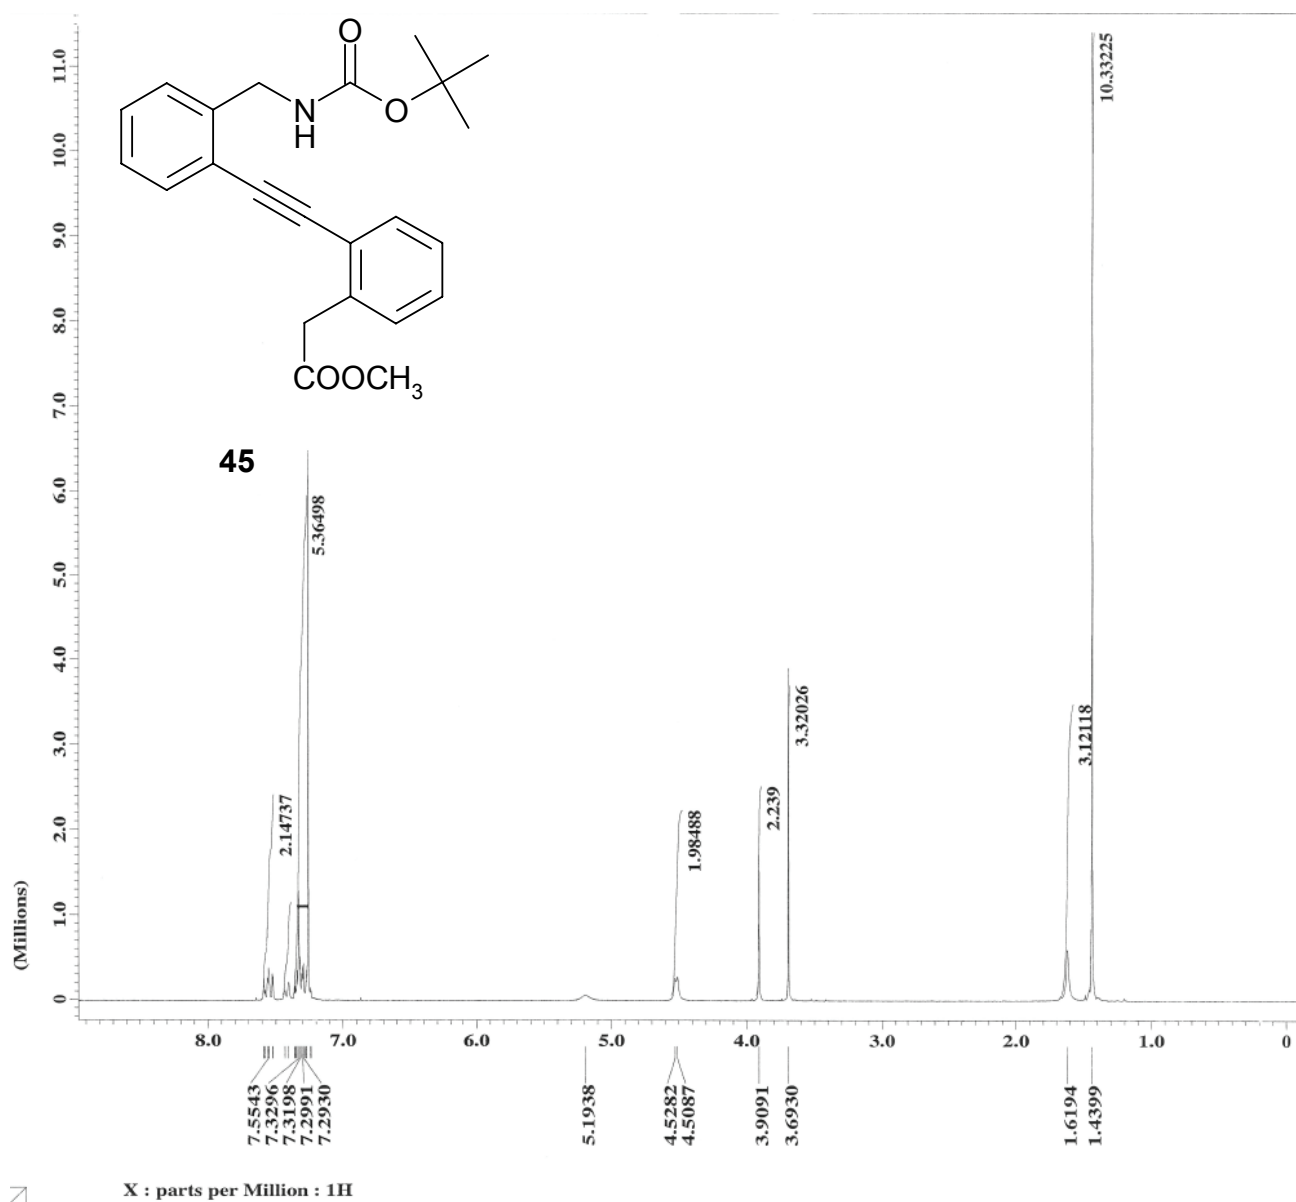Figure S 37: <sup>1</sup>H NMR spectrum of compound **45** (270.2 MHz, CDCl<sub>3</sub> solution, 25°C).

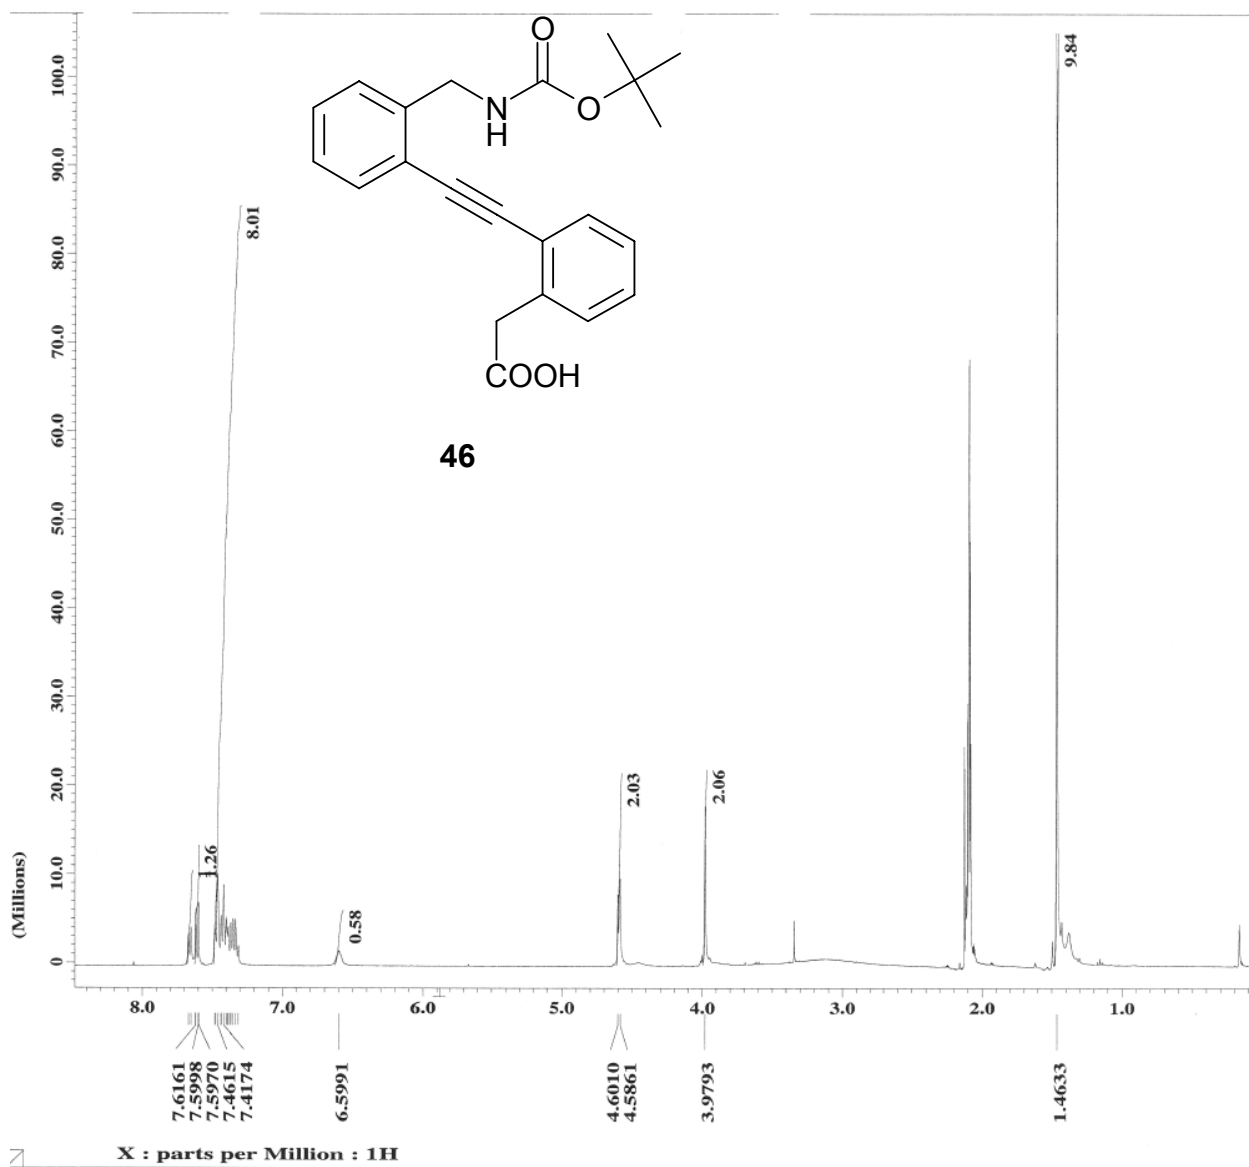Figure S 38:  $^1\text{H}$  NMR spectrum of compound **46** (399.8 MHz, acetone- $d_6$  solution, 25°C).

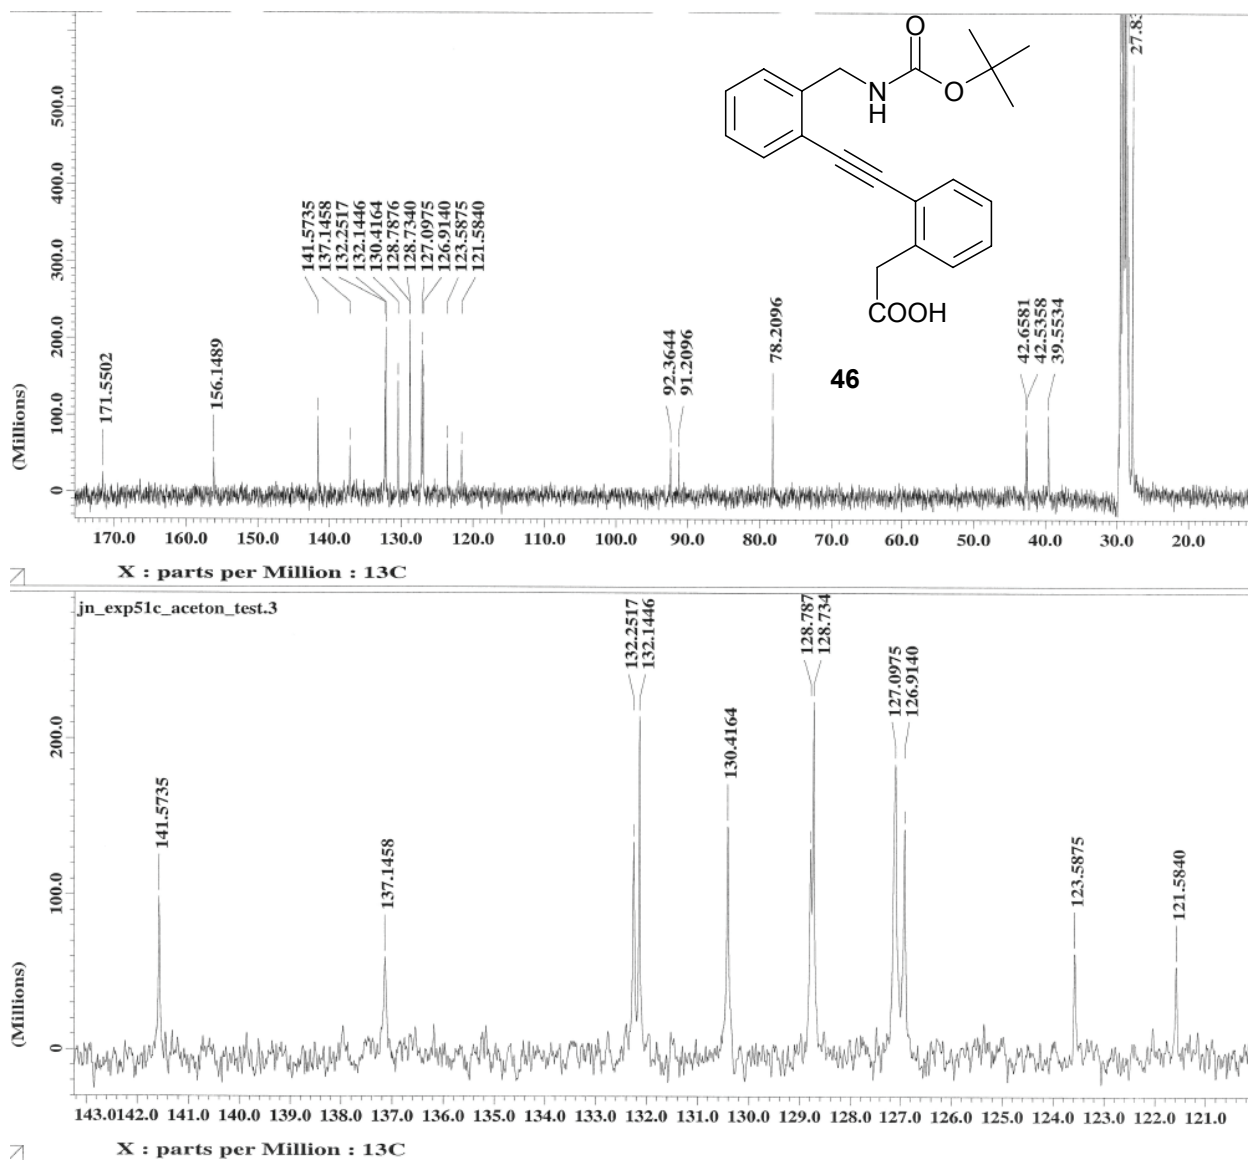Figure S 39:  $^{13}\text{C}$  NMR spectrum of compound **46** (100.5 MHz, acetone- $\text{d}_6$  solution, 25°C).
